# Supplementary material
Source: PubMed Central journal article supplement (PMC5789929)
Supplement: pnas.1715378115.sapp.pdf [file pnas.1715378115.sapp.pdf]

## SI METHODS

### Animals

Animal manipulation protocols were approved by the institutional ethics committee of the University of Quebec at Montreal (*Comité institutionnel de protection des animaux* (CIPA); Reference number: 650). For epistasis studies, *Toupee*<sup>Tg/Tg</sup> females (FVB/N background) and *Chd7*<sup>Gt/+</sup> males (C57BL/6-Sv129 mixed background) were intercrossed to generate *Toupee*<sup>Tg/+</sup>;*Chd7*<sup>Gt/+</sup> double heterozygotes and corresponding *Toupee*<sup>Tg/+</sup> single heterozygotes. *Chd7*<sup>Gt/+</sup> single heterozygotes on the same hybrid background were generated by crossing the same *Chd7*<sup>Gt/+</sup> males with wild-type FVB/N females.

For olfactory tests, after proper familiarization to the test conditions, mice were individually placed in a clean cage and exposed to a small piece of Whatman paper containing 100µl of water or 100µl of C57BL/6 urine (10<sup>-2</sup> dilution in water) during 2 min for each, with a 2 min interval between each exposition. The total number and cumulative duration of sniff bouts were recorded in order to express results as mean elapsed time per sniff bout.

### Image acquisition

Image acquisition was performed with a Leica DFC 495 camera (for color images) or a Lumenera Infinity 2.0 camera (for black and white images) mounted on a Leica M205 FA stereomicroscope, with the exception of immunofluorescence analyses which were imaged with a Nikon A1 laser scanning confocal microscope. Image processing and analysis was all done with the ImageJ software, including for cell counting, measurement of choroidal fissure width as well as analysis of migration speed and persistence (see below). For Pearson correlation analysis, relevant images were deconvoluted and analyzed with the AutoQuant 3X program.

### *Ex vivo* time-lapse imaging of NCCs

The posterior end of an e10.5 embryo (obtained from G4-RFP or *Toupee*<sup>Tg/Tg</sup> ;G4-RFP intercrosses) containing pre-migratory NCCs was cut transversely behind the hindlimb bud and deposited on a small nitrocellulose filter (Millipore GSWP01300) so that a lateral side is attached to the filter and the other side is free to be imaged. The filter paper was then flipped (with tissue side down) onto paraffin rods streaked in parallel on a 60-mm cell culture dish (Corning). The samples were cultured in DMEM/F12 containing 10% FBS and penicillin/streptomycin, and incubated in a microscope incubation chamber (Okolab) under standard conditions (37°C, 5% CO<sub>2</sub>) during 15h while 600 µm-thick stacks were acquired every 10 min (Nikon AIR confocal unit; 10X objective). Only NCCs migrating ventrally through the anterior half of somites were taken into account. Average speed (total tracked distance divided by total time) and persistence (straight line from start to finish divided by total tracked distance) were calculated from 40-min periods.

### FACS

Embryonic tissues (whole e10.5 embryos for RNAseq; heads and trunks of e10.5, e13.5 and e16.5 embryos for RT-qPCR) obtained from G4-RFP or *Toupee*<sup>Tg/Tg</sup> ;G4-RFP intercrosses were dissociated at 37°C with 1.3 mg/ml dispase II, 0.4 mg/ml collagenase and 0.1 mg/ml DNase I in EMEM medium. For each biological replicate, between 240,000-300,000 RFP+ and RFP- cells (from a total of 6-8 embryos at e10.5 or 1-2 embryos at e13.5 and e16.5) were collected using the BD FACSJazz cell sorter (BD Biosciences) and stored at -80°C until RNA extraction.

## High throughput genome and transcriptome sequencing

Whole genome and transcriptome sequencing was performed at McGill University and Génome Québec Innovation Centre. This included library generation, sequencing using the HiSeq 2500 platform (Illumina) and bioinformatics analysis. For RNAseq, ribosomal RNA-depleted libraries (using 120 ng of total RNA as starting material) were generated and sequenced for three biological replicates per genotype (G4-RFP vs *Toupee*<sup>Tg/Tg</sup>; G4-RFP) but only two per genotype met quality criteria for subsequent bioinformatics analysis. Paired-end sequences of 100-bp in length (215 million reads for the genomic DNA and between 51-84 million reads per transcriptome sample) were mapped onto the mm10 *Mus musculus* reference genome.

## Cell culture and transfection

For primary culture of e10.5 embryonic cells, whole embryos were dissociated as described above for FACS and the resulting cell suspension ( $10^{-1}$  dilution in EMEM medium) was plated on gelatin-coated coverslips in 6-well plates. Dissociated cells were cultured in EMEM medium containing 10% FBS and penicillin/streptomycin under standard conditions (37°C and 5% CO<sub>2</sub>).

## Co-IP, RIP, ChIP and RNA-ChIP

Co-IPs were performed in defined buffer (20 mM Tris pH 8.0, 1 mM EGTA, 1.5 mM MgCl<sub>2</sub>, 1 mM DTT, 1% Triton TX-100, 10% Glycerol, 1X Roche Complete protease inhibitors), containing either 25 or 200 mM NaCl. For untargeted ChIP and RIP experiments, cross-linked Neuro2a cells (using 1% PFA) were sonicated either in nuclear lysis buffer (50 mM Tris-HCl pH 8.0, 10 mM EDTA, 1% SDS, 1X Roche Complete protease inhibitors) for ChIP or in RIPA buffer (50 mM Tris-HCl pH 7.4, 2 mM EDTA, 150 mM NaCl, 1% NP-40, 0.5% Na-deoxycholate, 0.1% SDS, 1X Roche Complete protease inhibitors) for RIP. The nucleic acid content of purified ChIP and RIP samples was then assessed via Qubit fluorometric quantitation (ThermoFisher Scientific). For targeted ChIP and RNA-ChIP experiments, Neuro2a cells were treated with either vehicle (DMSO) or 25ng/ml Phorbol 12-myristate 13-acetate (PMA) for 4 hours. For RNA-ChIP, immunoprecipitated samples were also treated with 100 µg/ml DNase I during 2 hours at 4°C, followed by RNA extraction and reverse transcription.

## MBP fusion proteins and serine hydrolase assay

MBP, MBP<sup>Fam172a</sup> and MBP<sup>Fam172a</sup><sup>S294A</sup> proteins were produced in BL21 bacteria via IPTG (0.3 mM) induction of relevant pMAL-c5X constructs. Bacterially-produced proteins were then purified via amylose affinity chromatography and eluted with column buffer (20 mM Tris-HCl pH7.4, 200 mM NaCl, 1 mM EDTA, 1X Roche Complete protease inhibitors) supplemented with 100 mM maltose. For serine hydrolase assay, each protein sample (7.5 µg) was mixed with the probe, incubated at room temperature in the dark for 30 minutes and migrated on a 10% SDS-polyacrylamide gel.

## Affinity purification coupled to tandem mass spectrometry analysis

Neuro2a cell extracts were fractionated using buffer conditions specific to each fraction: cytoplasm (10 mM Tris-HCl pH 8.0, 0.34 M sucrose, 3 mM CaCl<sub>2</sub>, 2 mM MgOAc, 0.1 mM EDTA, 0.5% NP-40, 1 mM DTT and 1X Roche Complete protease inhibitors), nucleoplasm (20 mM Hepes pH 7.9, 1.5 mM MgCl<sub>2</sub>, 150 mM KOAc, 3 mM EDTA, 10% glycerol, 0.1% NP-40, 1 mM DTT and 1X Roche Complete protease inhibitors) and chromatin (150 mM Hepes pH 7.9, 1.5 mM MgCl<sub>2</sub>, 150 mM KOAc, 10% glycerol, 15 U/ml Benzonase, 0.44 U/ml RNase A, 6.25 U/ml DNase I, 1X Roche Complete protease inhibitors). Each

Neuro2a cell fraction (1.25mg) was passed on an amylose resin column containing immobilized <sub>MBP</sub>Fam172a or MBP alone. Following extensive washing, interacting proteins were co-eluted with <sub>MBP</sub>Fam172a or MBP as described above for the purification of MBP fusion proteins. Eluates were then individually precipitated using 72% TCA, 0.075% Na-deoxycholate and 2.5X Tris-EDTA. Preparation of tryptic fragments, LC-MS/MS analysis on a LTQ Orbitrap Fusion Tribrid mass spectrometer (ThermoFisher Scientific) and peptide identification were performed at the Proteomics Discovery Platform of the *Institut de recherches cliniques de Montreal* (IRCM). Proteins identified via at least one peptide (with probability greater than 90%) were accepted as <sub>MBP</sub>Fam172a interactors if they were enriched at least 1.5-fold in comparison to the MBP negative control and detected in at least two out of the three biological replicates per fraction.

Figure S1

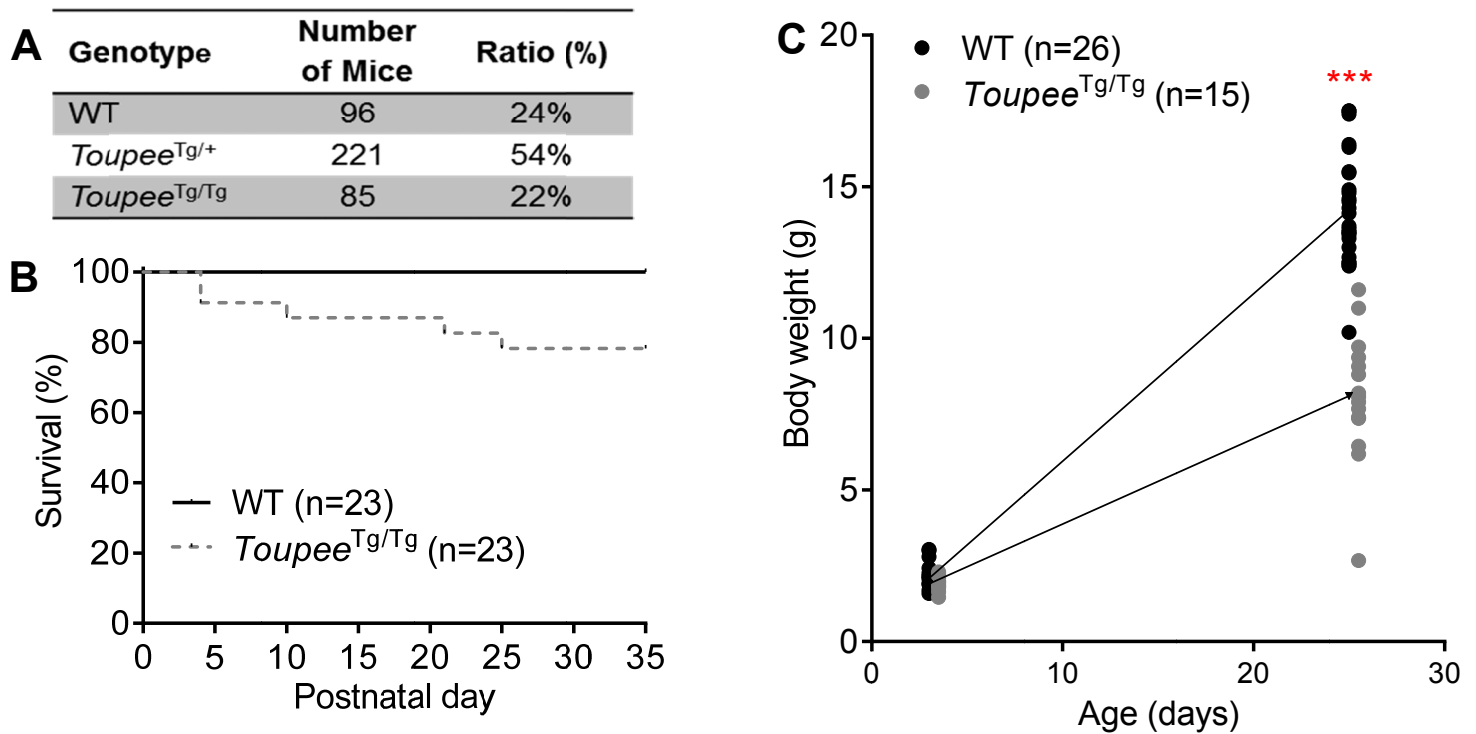

**Figure S1. Early death and growth retardation in *Toupee*<sup>Tg/Tg</sup> mice.** (A) Genotype distribution of offspring from *Toupee*<sup>Tg/+</sup> intercrosses (n=48 couples) at weaning. (B) Kaplan-Meier survival curve for WT and *Toupee*<sup>Tg/Tg</sup> mice. (C) Body weight comparison of WT and *Toupee*<sup>Tg/Tg</sup> mice at P3 and P25.



**Figure S2**

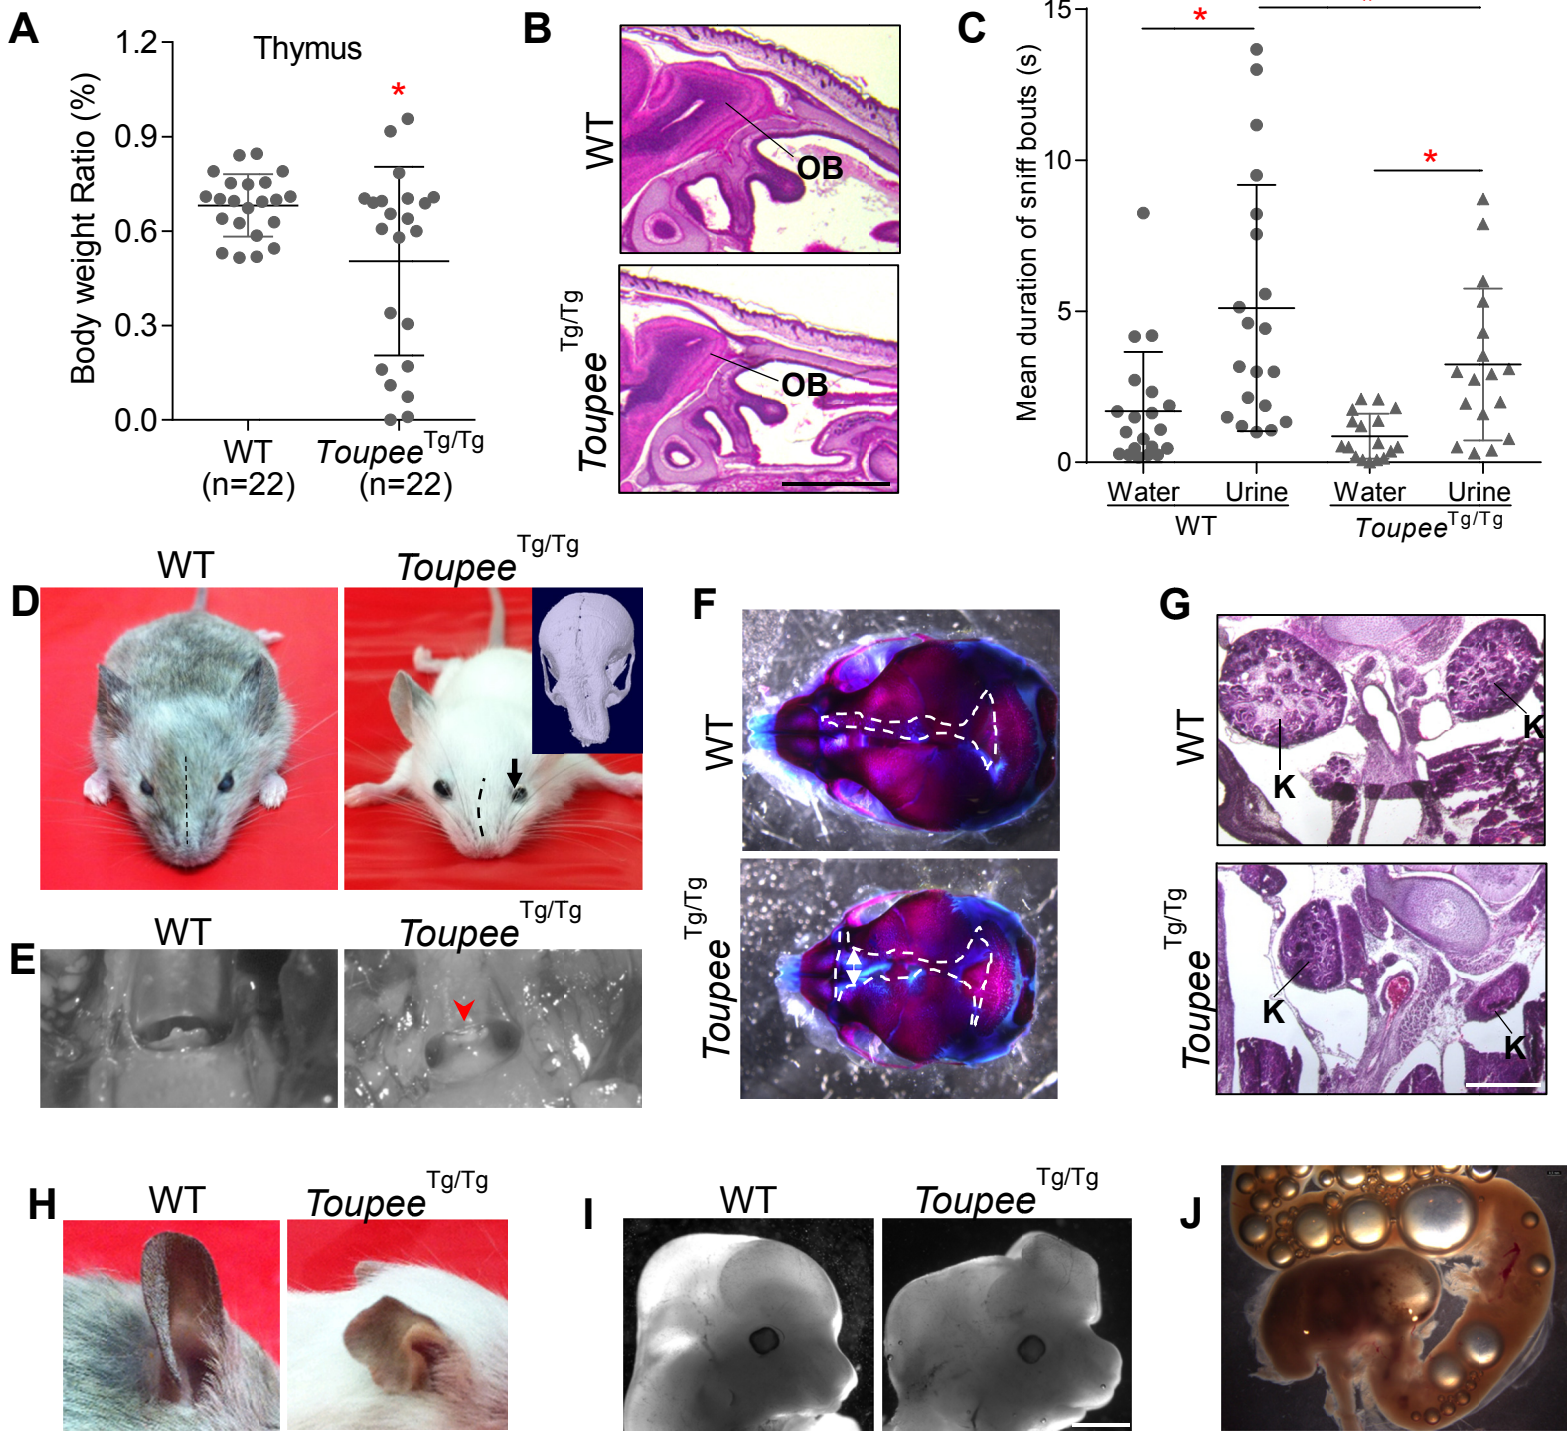

**Figure S2. Less frequently observed minor features of CHARGE syndrome in *Toupee*<sup>Tg/Tg</sup> mice.** (A) A subset of *Toupee*<sup>Tg/Tg</sup> mice exhibits a lower thymus/body weight ratio at P25. (B) H&E-stained sagittal sections of e18.5 heads (n=10 per genotype) revealing olfactory bulb hypoplasia in a subset of *Toupee*<sup>Tg/Tg</sup> embryos. (C) Results of olfaction tests (n=20 mice per genotype) showing that adult *Toupee*<sup>Tg/Tg</sup> mice are less efficient than WT mice at distinguishing urine from water. (D) A subset of *Toupee*<sup>Tg/Tg</sup> mice displays facial asymmetry including unilateral eyelid ptosis (arrow) and twisted facial bones (see  $\mu$ CT scan in the inset). (E) Frontal view of the oropharynx at P25 showing partial atresia (arrowhead) in a *Toupee*<sup>Tg/Tg</sup> animal. (F) Alizarin red and alcian blue double-stained e18.5 skulls (n=10 per genotype) showing that closure of the fontanelles (delineated by dashed lines) is delayed in a subset of *Toupee*<sup>Tg/Tg</sup> embryos (double-headed arrow). (G) H&E-stained cross-sections of e15.5 embryos showing kidney (K) hypoplasia in a *Toupee*<sup>Tg/Tg</sup> animal. (H) The outer ear of *Toupee*<sup>Tg/Tg</sup> animals is occasionally malformed. (I) Lateral view of e12.5 heads demonstrating exencephaly in a *Toupee*<sup>Tg/Tg</sup> embryo. (J) Gastrointestinal track of a P24 *Toupee*<sup>Tg/Tg</sup> animal filled with air bubbles. \*  $P \leq 0.05$  (Student's *t*-test). Scale bar: 1mm (B), 500 $\mu$ m (G).

**Figure S3**

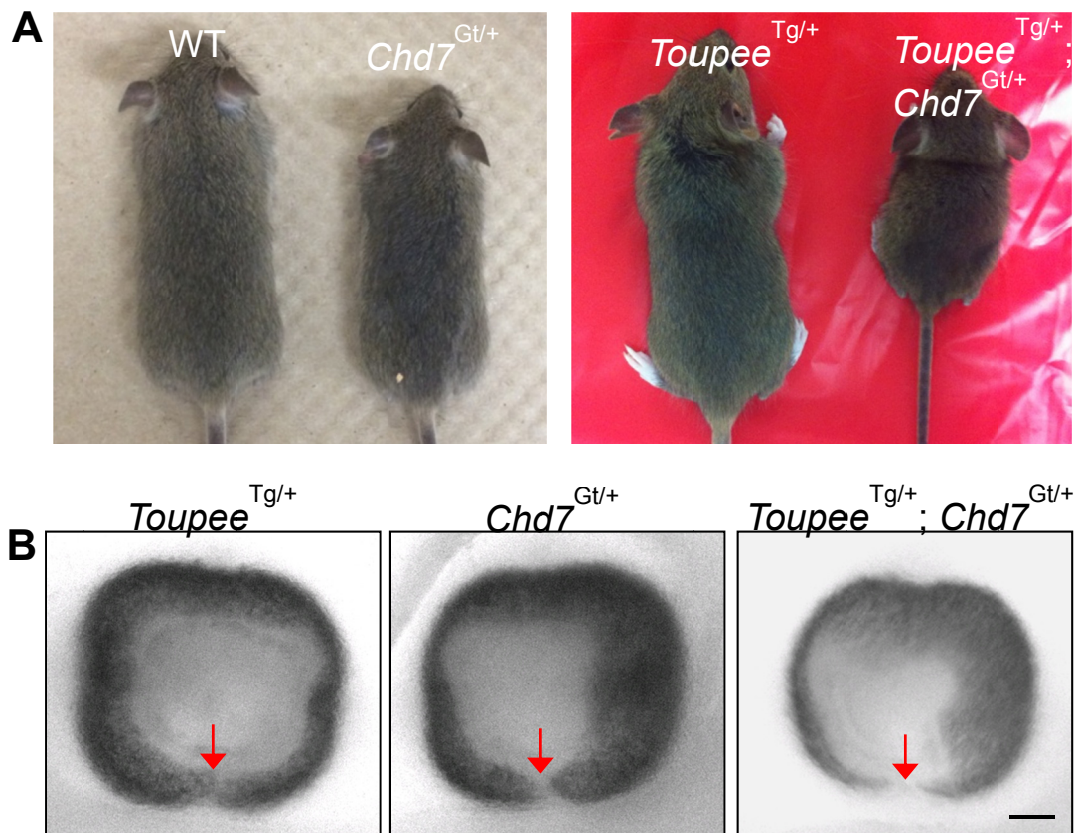

**Figure S3. Genetic interaction between *Toupee*<sup>Tg</sup> and *Chd7*<sup>Gt</sup> alleles. (A) *Toupee*<sup>Tg/+</sup>; *Chd7*<sup>Gt/+</sup> double mutants are markedly smaller than corresponding single mutants at P25. (B) Representative bright field images of e12.5 eyes showing that the choroidal fissure (red arrows) is wider in double mutant embryos. Scale bar: 50 $\mu$ m.**



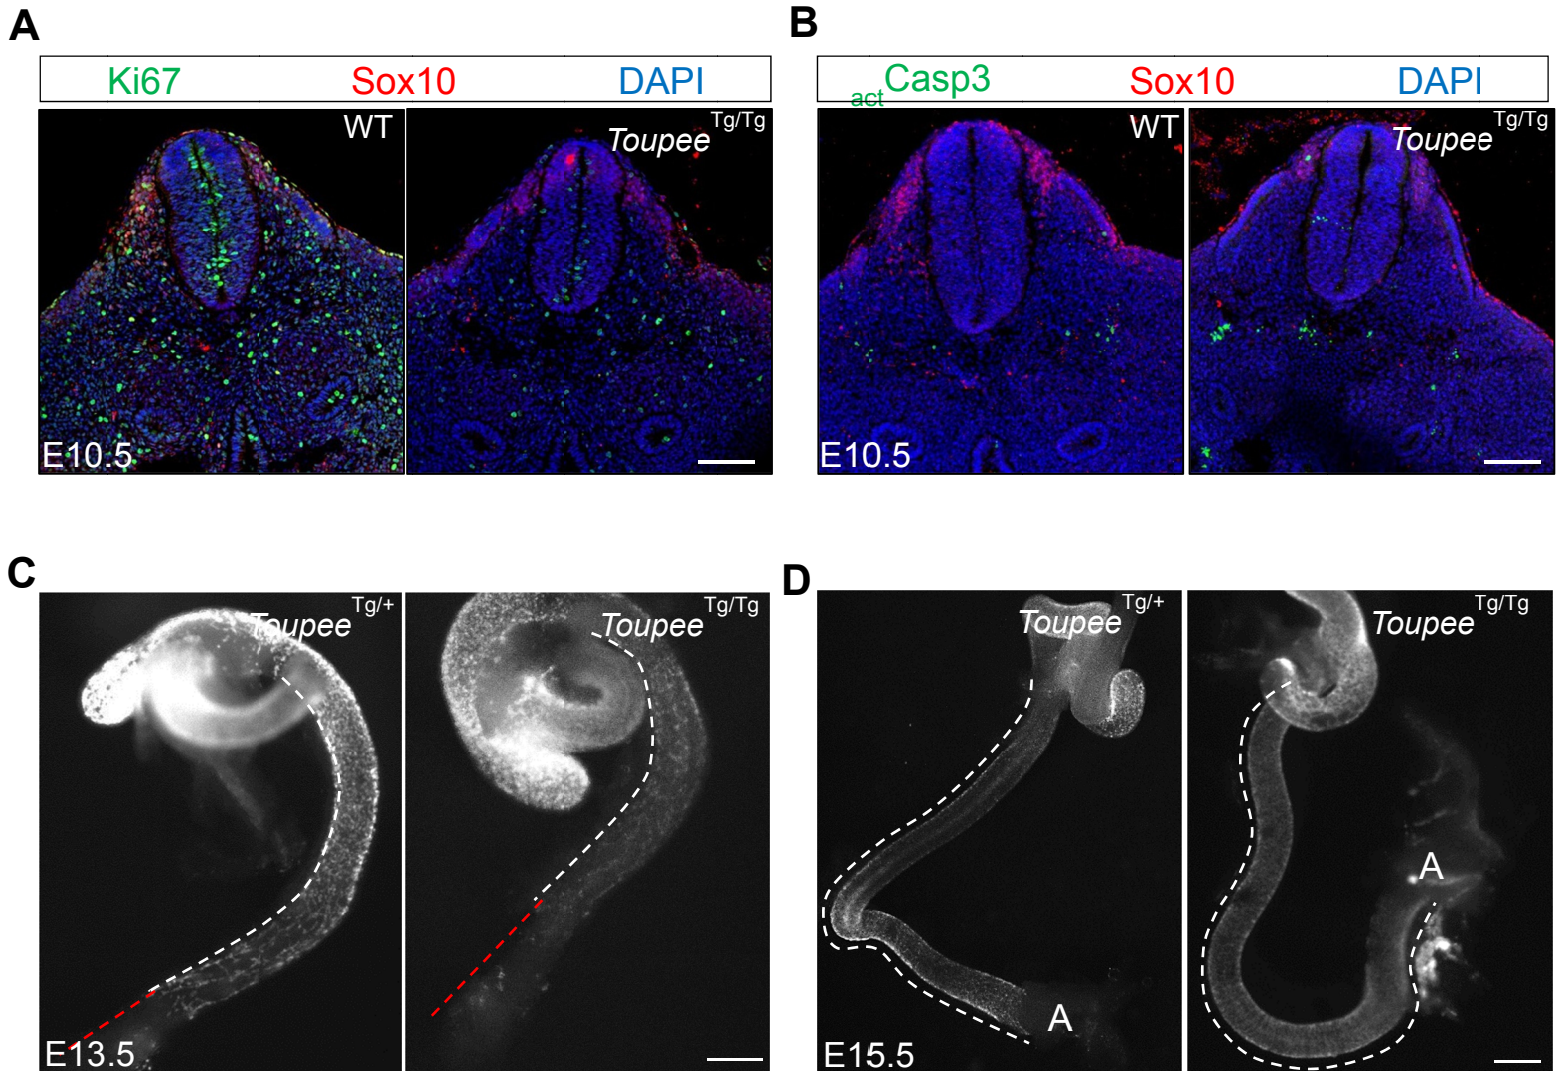

**Figure S4. Defective NCC proliferation, survival and migration in *Toupee*<sup>Tg/Tg</sup> embryos.** (A-B) Representative immunofluorescence images used for quantification of NCC proliferation and survival in Fig.2A-B (n=9 per genotype). Cross-sections (30 $\mu$ m) of e10.5 embryos at the level of the hindlimb bud were double-labeled with anti-Sox10 (red) and anti-Ki67 or anti-activated Caspase3 (green), and counterstained with DAPI (blue). (C-D) Representative images used for quantification of hindgut colonization by fluorescently labeled (owing to G4-RFP transgene) enteric NCCs in Fig.2E. The white dashed lines delineate the colonized hindgut segment, whereas the red dotted lines delineate the uncolonized hindgut segment (for each developmental stage, n=5 per genotype). Scale bars: 100 $\mu$ m (A-B), 500 $\mu$ m (C) and 1mm (D).

**Figure S5**

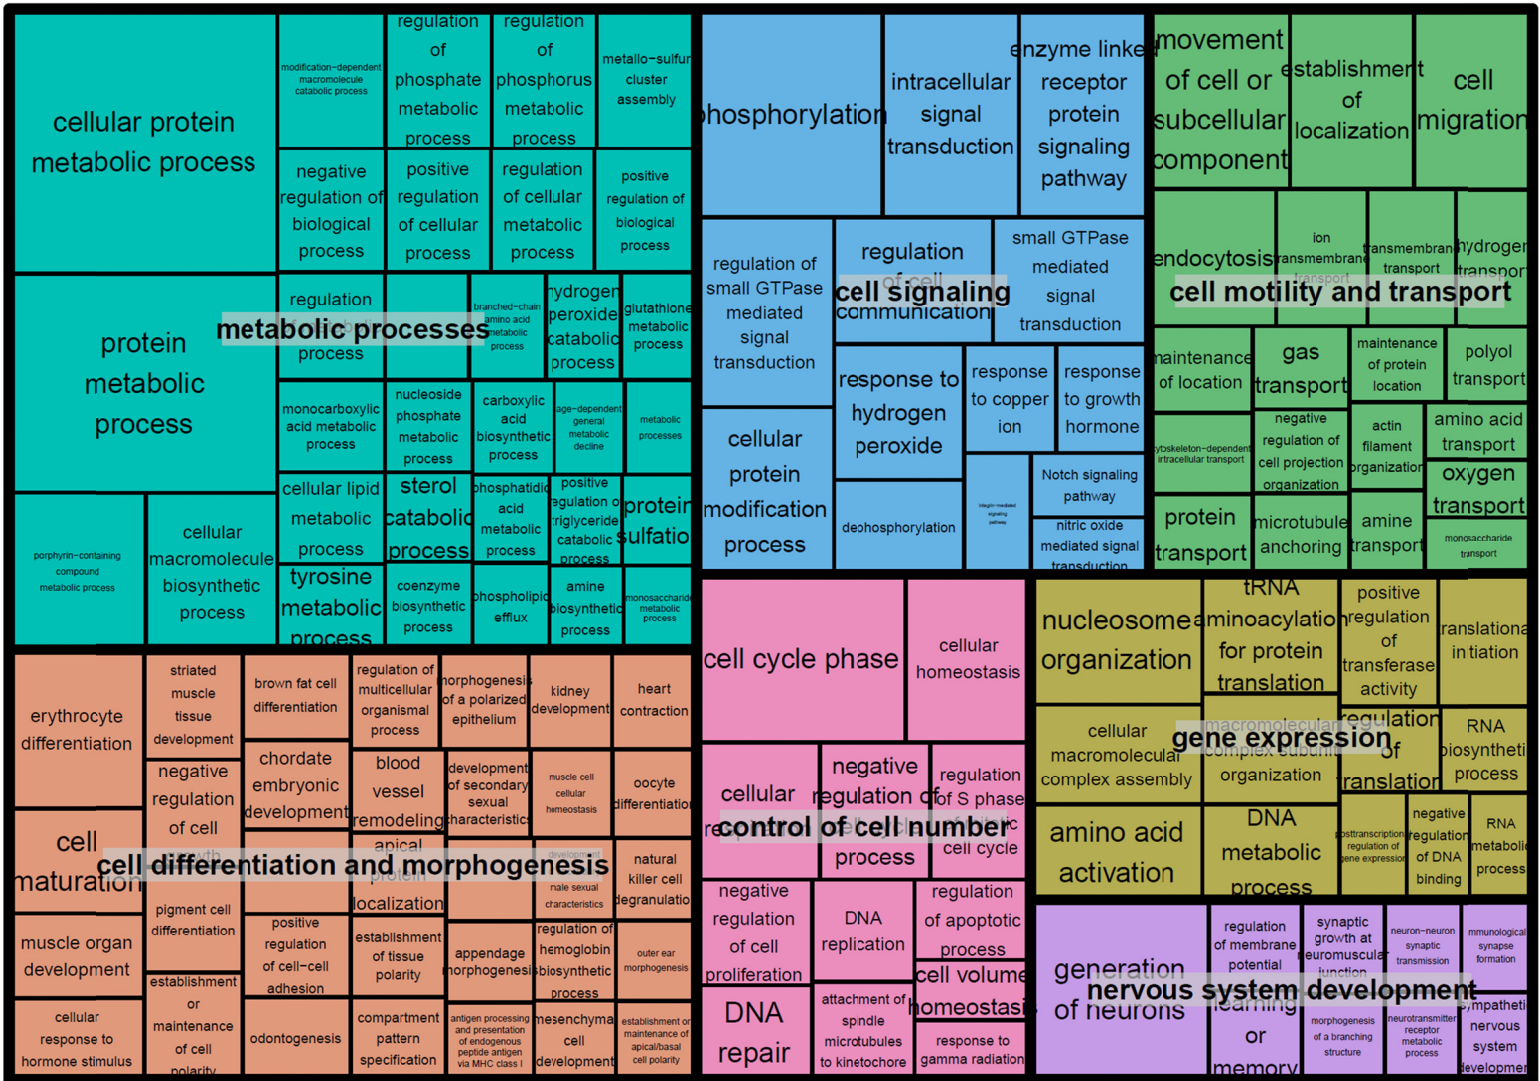

**Figure S5.** Enriched GO terms associated with the differentially expressed genes in *Toupee*<sup>Tg/Tg</sup> NCCs. REVIGO TreeMap representation of the GO analysis of the 3488 modulated genes displayed in Fig.2F. The 132 enriched terms (ontology level  $\geq 5$  and  $P < 0.05$ ) are distributed into 7 main categories: Metabolic processes; Cell differentiation and morphogenesis; Cell signaling; Cell motility and transport; Control of cell number; Gene expression; and Nervous system development. Size of boxes is proportional to statistical significance.

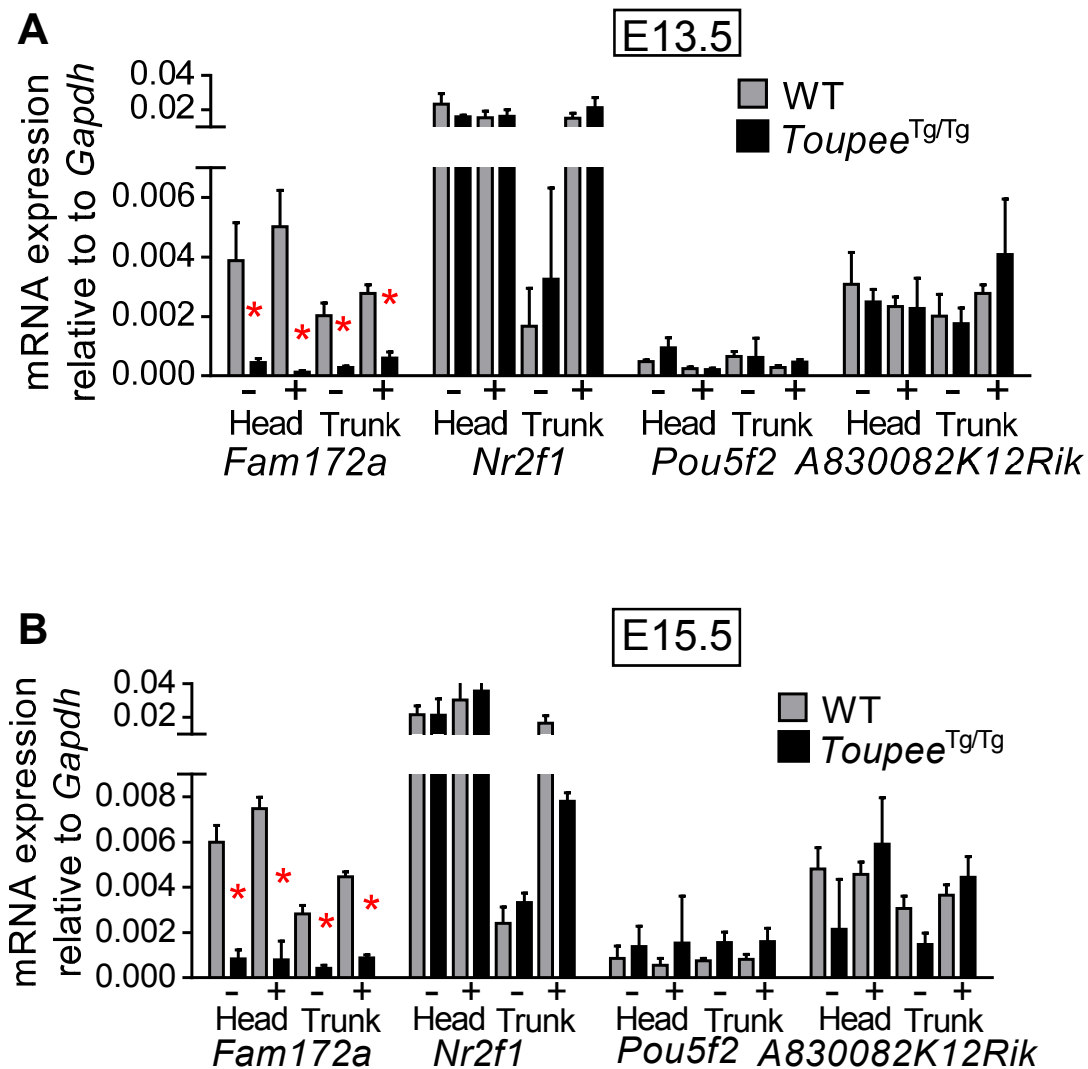

**Figure S6. Specific downregulation of *Fam172a* expression in *Toupee*<sup>Tg/Tg</sup> embryos.** RT-qPCR analyses of gene expression in *G4-RFP* (WT) and *Toupee*<sup>Tg/Tg</sup>*:G4-RFP* (*Toupee*<sup>Tg/Tg</sup>) embryos at e13.5 (A) and e15.5 (B). Transcript levels of *Fam172a*, *Pou5f2*, *Nr2f1* and *A830082k12Rik* were monitored in FACS-recovered NCCs (+) and non-NCCs (-) from the head and the trunk (n=3 per condition). Expression levels were normalized relative to *Gapdh*. \*  $P \leq 0.05$ .



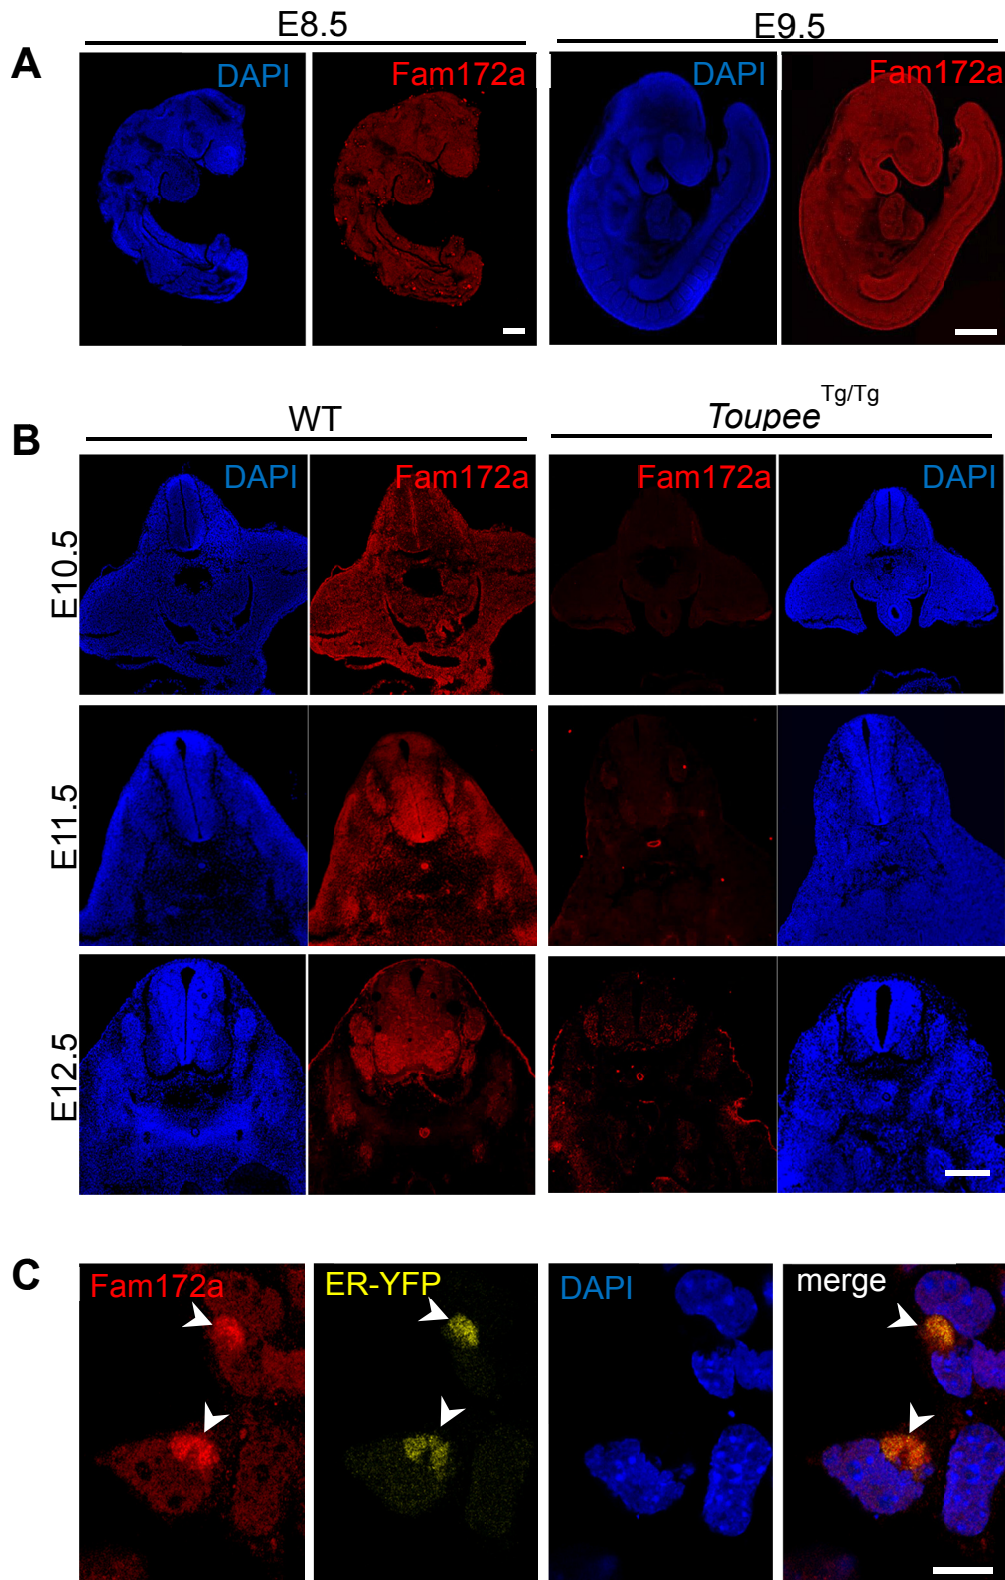

**Figure S7. Analysis of Fam172a protein distribution in mouse embryos and COS7 cells. (A-B)** Immunofluorescence analysis of the Fam172a protein in e8.5-9.5 WT embryos (A) and in cross-sections of e10.5-12.5 WT and *Toupee*<sup>Tg/Tg</sup> embryos (B) at hindlimb level (n=6 per genotype). (C) Immunofluorescence labeling of endogenous Fam172a in COS7 cells transfected with the pEYFP-ER plasmid (Clontech) and counterstained with DAPI (n=6). White arrowheads indicate ER localization. Scale bar, 200µm (A-B), 25µm (C).

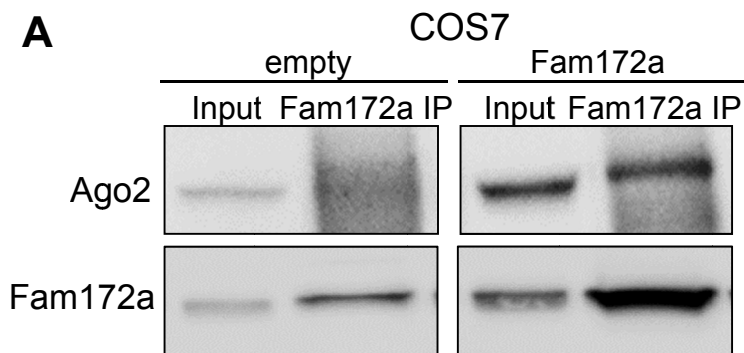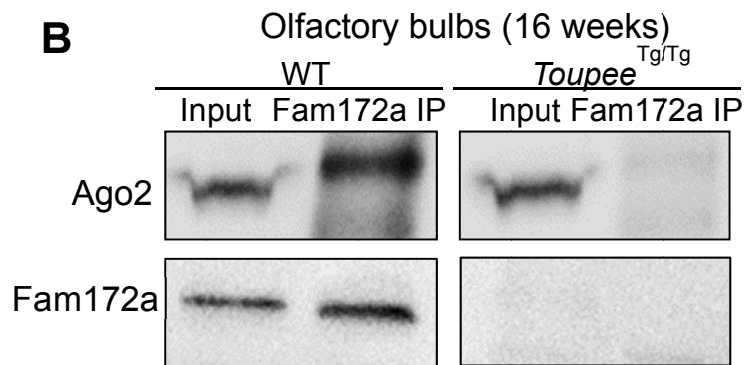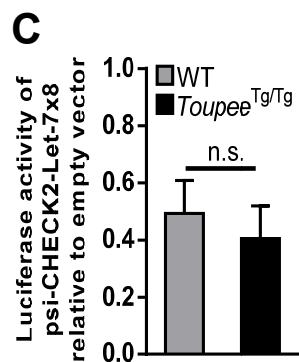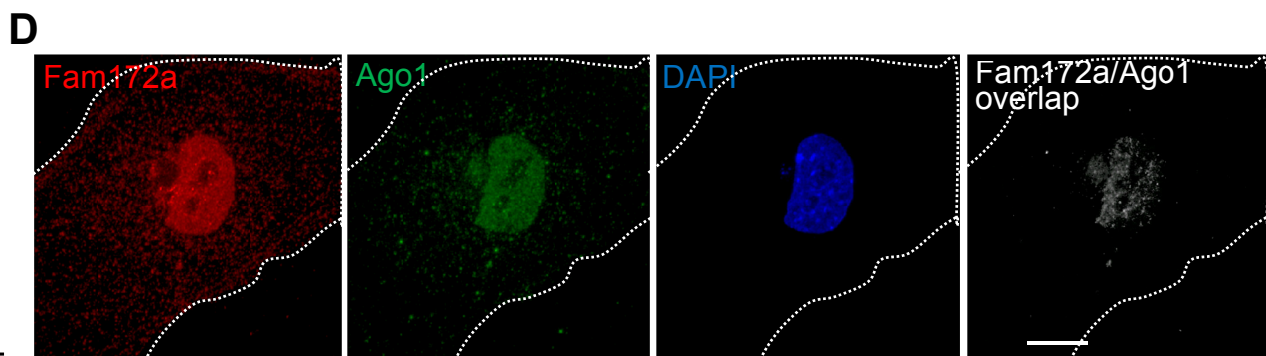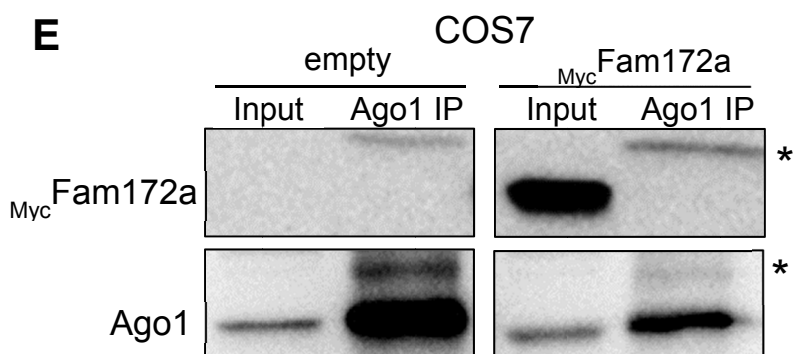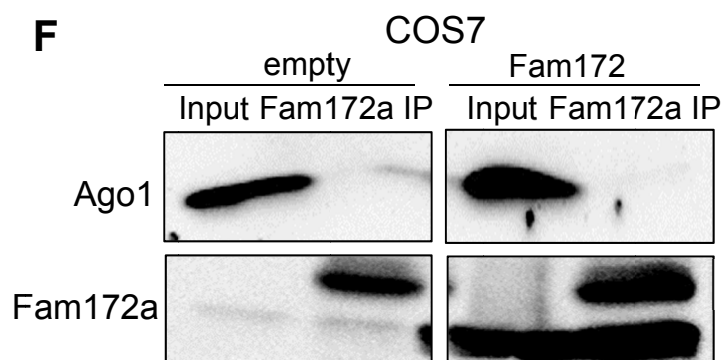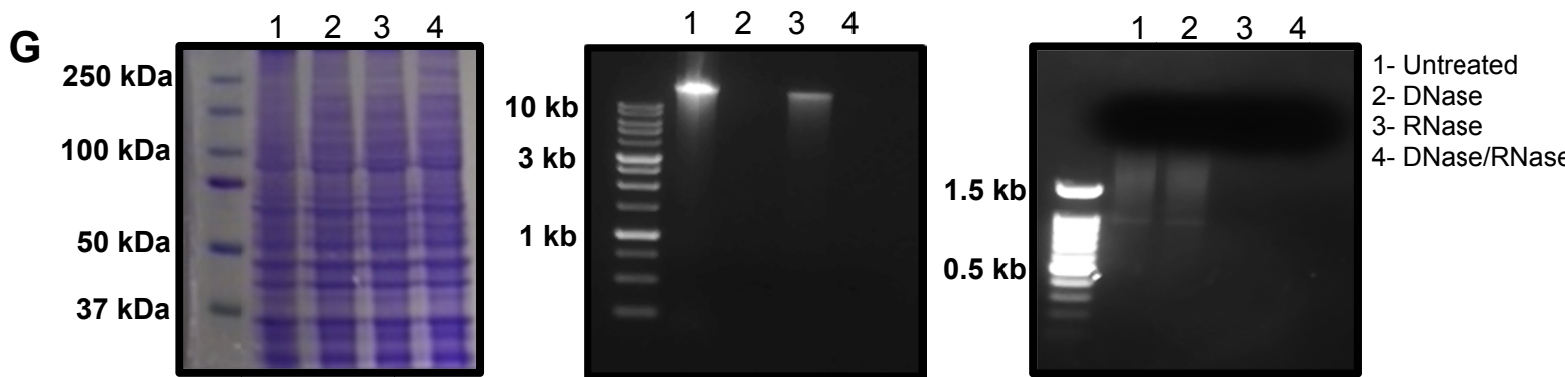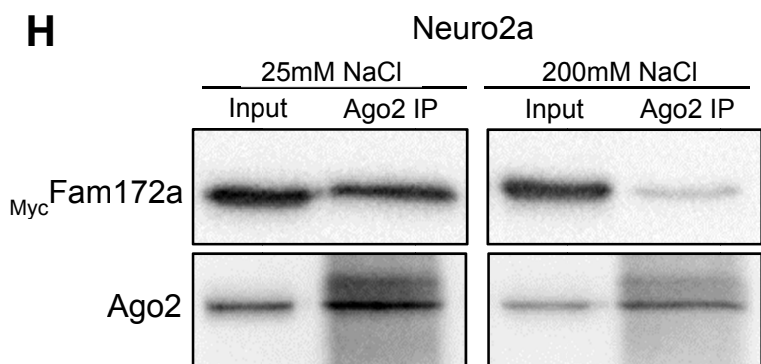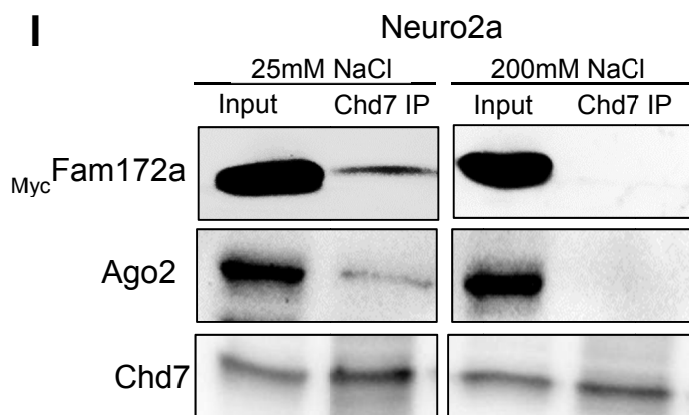

**Figure S8. Fam172a physically interacts with Ago2 but not with Ago1. (A-B)** Co-IP assays using whole cell extracts of COS7 cells (A; transfected with a Fam172a-expressing or empty vector) or of adult mouse olfactory bulbs (B; WT vs *Toupee*<sup>Tg/Tg</sup>). IPs were performed with an anti-Fam172a antibody and analyzed by western blot using an anti-Ago2 antibody. Inputs correspond to 10% of protein extracts used for IP (n=3 per condition). **(C)** Luciferase activity from the psi-CHECK2-let-7x8 reporter relative to empty psi-CHECK2 vector in cultures of dissociated e10.5 embryos (WT vs *Toupee*<sup>Tg/Tg</sup>). **(D)** Double immunofluorescence labeling of Fam172a (red) and Ago1 (green) in dissociated cells from WT e10.5 embryos (n=7). DAPI was used to counterstain nuclei (blue). The right panel shows the overlap of Fam172a and Ago1 signals (Pearson's correlation coefficient of 0.63) as determined with the AutoQuant 3X software. Scale bar: 25µm. **(E-F)** Co-IP assays using whole cell extracts of COS7 cells transfected with empty or <sub>Myc</sub>Fam172a-expressing vector. IPs were performed with an anti-Ago1 (E) or anti-Fam172a (F) antibody and analyzed by western blot using anti-Ago1 and either anti-Myc (E) or anti-Fam172a (F) antibodies. Inputs correspond to 10% of protein extracts used for IP (n=3 per condition). The asterisk indicates the presence of mouse IgG heavy chain. **(G)** Impact of DNase and RNase treatments on the integrity of proteins (left panel), DNA (middle panel) and RNA (right panel) in whole-cell extracts, as described in Fig.4B. **(H-I)** Co-IP assays using whole cell extracts of Neuro2A cells (transfected with a <sub>Myc</sub>Fam172a-expressing vector) in presence of different concentrations of NaCl. IPs were performed with an anti-Ago2 (H) or anti-Chd7 (I) antibody and analyzed by western blot using anti-Myc, anti-Ago2 and anti-Chd7 antibodies. Inputs correspond to 10% of protein extracts used for IP (n=3 per condition).



**Figure S9**

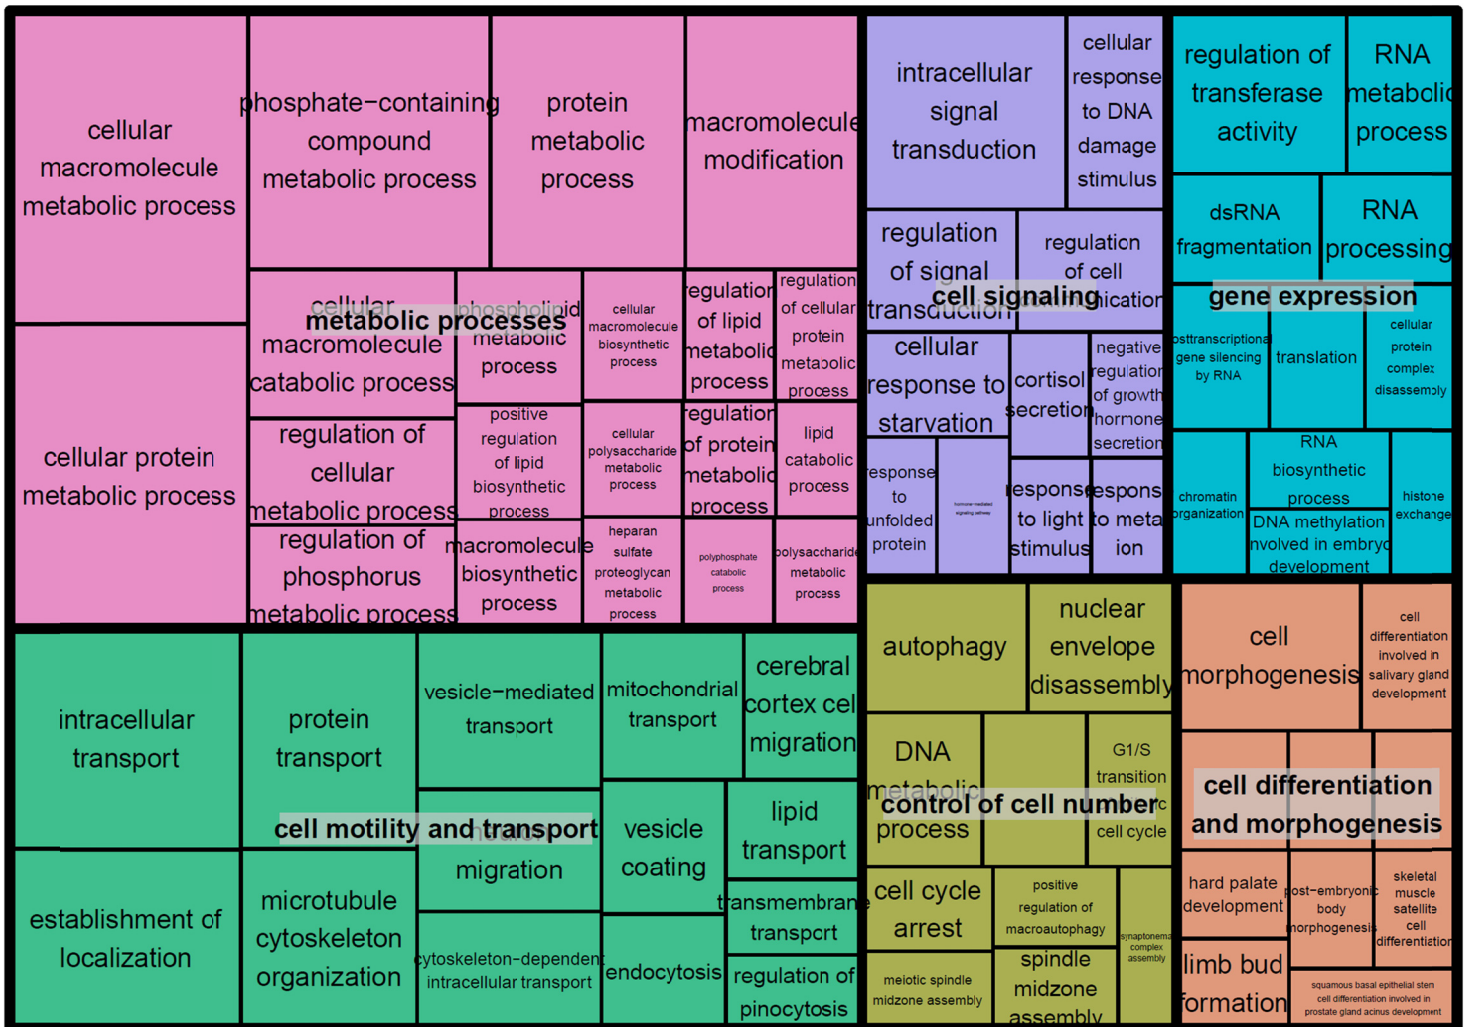

**Figure S9. Enriched GO terms associated with the modulated transcript variants in *Toupee*<sup>Tg/Tg</sup> NCCs.** REVIGO TreeMap representation of the GO analysis of the 1166 aberrantly spliced transcripts displayed in Fig.4C. The 75 enriched terms (ontology level  $\geq 5$  and  $P < 0.05$ ) are distributed into 6 main categories: Metabolic processes; Cell motility and transport; Cell signaling; Gene expression; Control of cell number; and Cell differentiation and morphogenesis. Size of boxes is proportional to statistical significance.

**Figure S10**

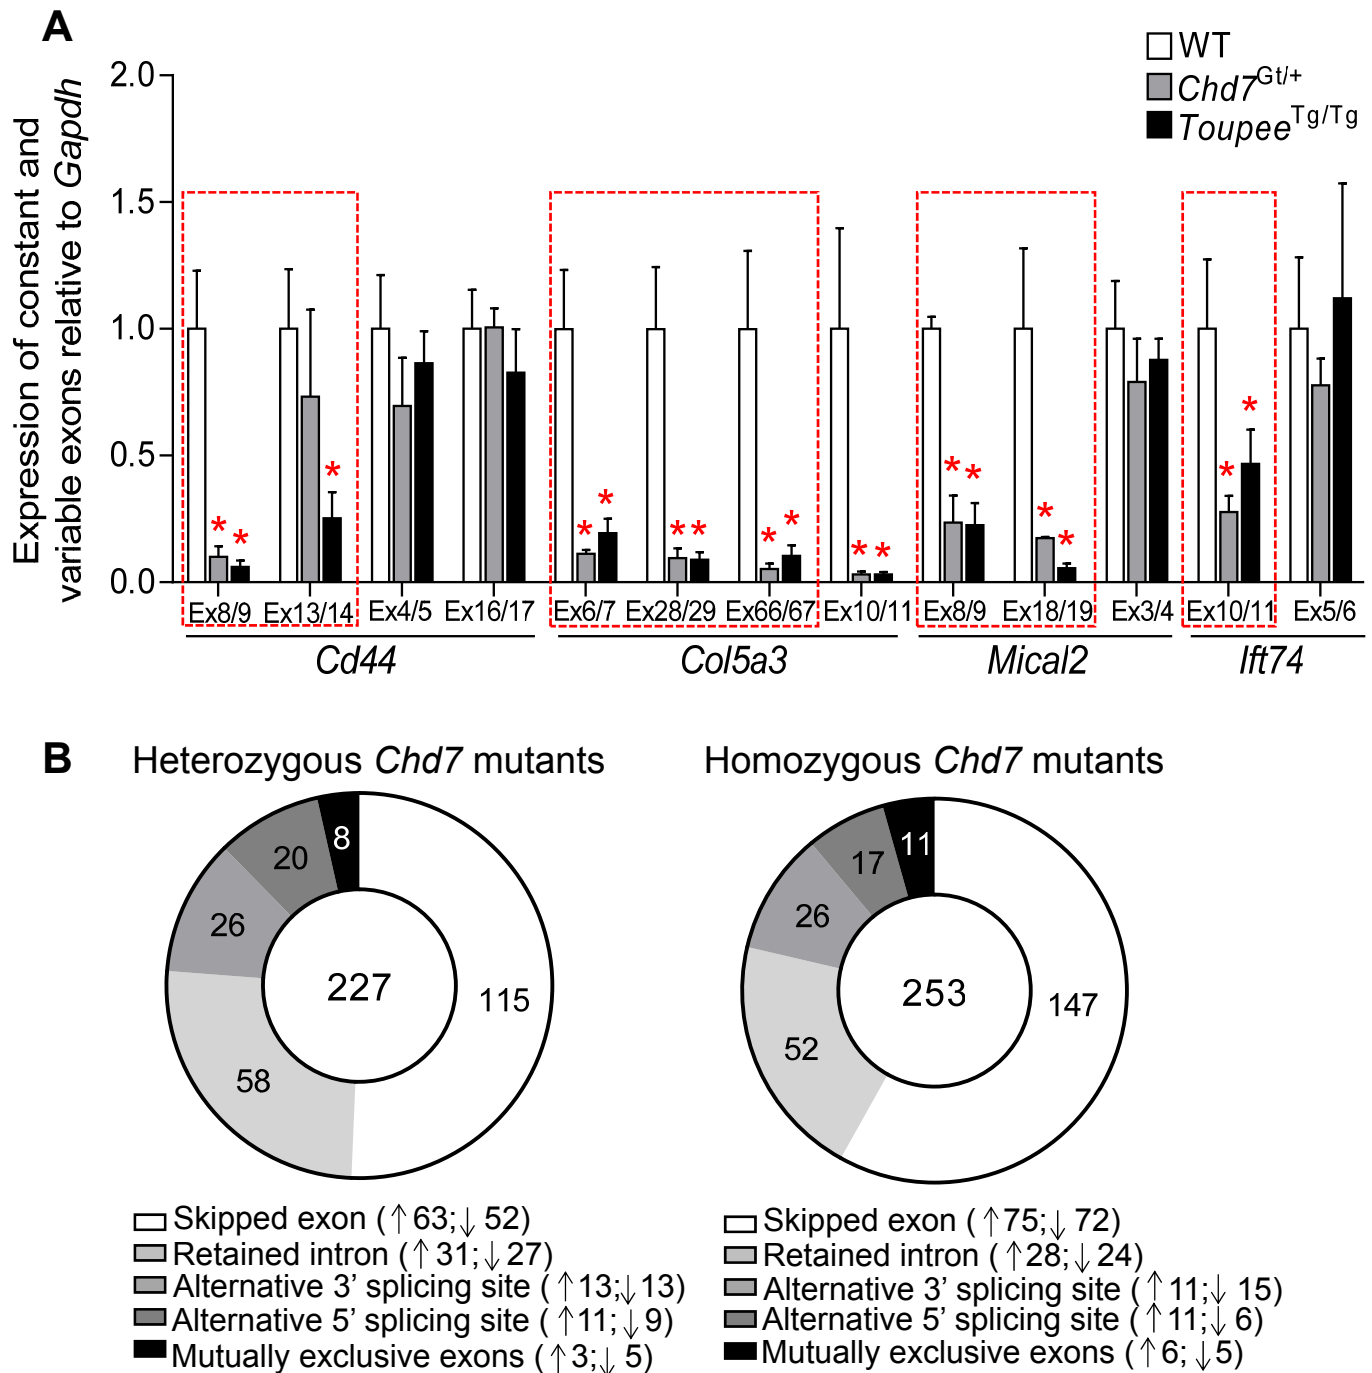

**Figure S10. Detailed analysis of alternative splicing in *Toupee*<sup>Tg/Tg</sup> and *Chd7*<sup>Gt/+</sup> mutants. (A)** RT-qPCR analysis of variably (delineated in red) and constantly expressed regions of 4 previously described Ago2-regulated genes (*Cd44*, *Col5a3*, *Mical2* and *Ifi74*) in the head of *G4-RFP* (WT), *Toupee*<sup>Tg/Tg</sup>; *G4-RFP* (*Toupee*<sup>Tg/Tg</sup>) and *Chd7*<sup>Gt/+</sup> e12.5 embryos (n=5 per genotype). Transcript levels were normalized relative to *Gapdh*. \*  $P \leq 0.05$  (Student's *t*-test). **(B)** Donut chart showing the distribution of the differentially modulated alternative splicing events ( $P < 0.05$ ; variation in inclusion level  $\geq 0.1$ ) in P7 granule neuron progenitors from heterozygous (227 events; Dataset S3) and homozygous (253 events; Dataset S4) *Chd7* mutants as determined by rMATS-based analysis of recently published RNAseq data (22). Upward- and downward-pointing arrows indicate splicing events that are over- and under-represented in *Chd7* mutants, respectively.

## Figure S11

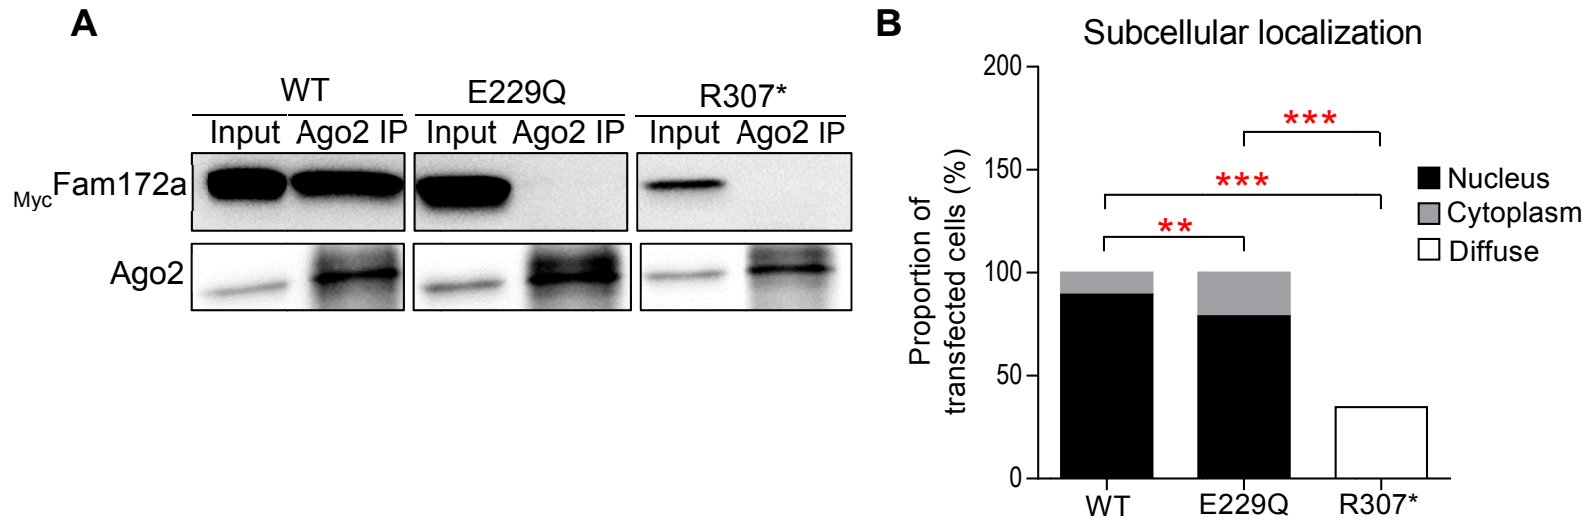

### Figure S11: Variants of Fam172 identified in human CHARGE patients fail to interact with Ago2.

**(A)** Co-IP assays using whole cell extracts of Neuro2A cells transfected with  $\text{MycFam172a}$ -,  $\text{MycFam172a}^{\text{E229Q}}$ - or  $\text{MycFam172a}^{\text{R307*}}$ -expressing plasmids. Following Ago2 IP, the presence of Myc-tagged Fam172a and Ago2 proteins was revealed using anti-Myc and anti-Ago2 antibodies, respectively. Inputs correspond to 10% of protein extracts used for IP (n=3 per condition). **(B)** Quantification of Fam172a localization following anti-Myc immunofluorescence labeling of Neuro2A cells transfected with  $\text{MycFam172a}$ -,  $\text{MycFam172a}^{\text{E229Q}}$  or  $\text{MycFam172a}^{\text{R307*}}$  expression vectors. \*\*  $P \leq 0.01$ , \*\*\*  $P \leq 0.001$  (Student's *t*-test)

**Figure S12**

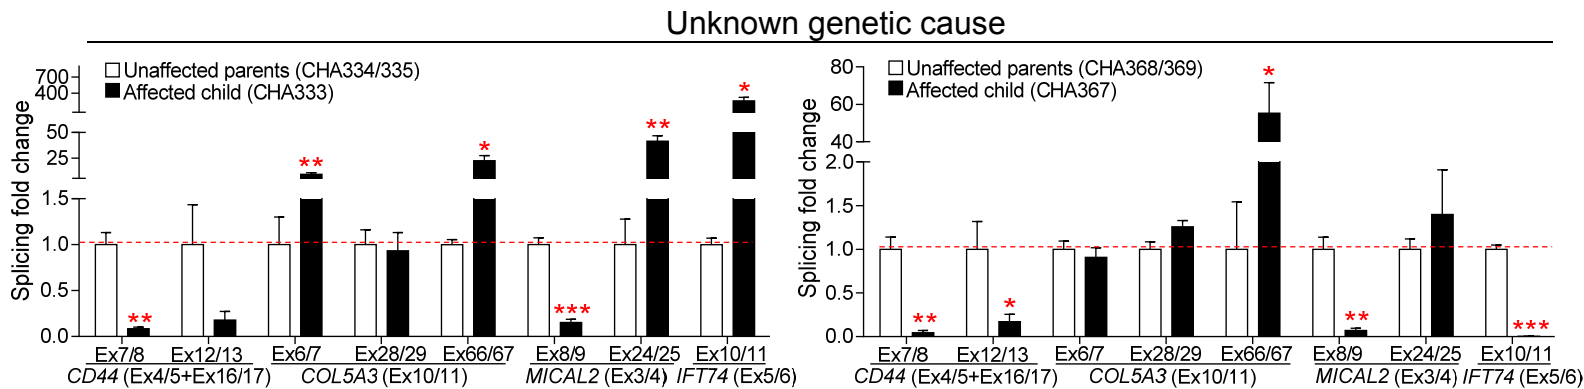

**Figure S12: Dysregulation of alternative splicing in supplemental CHARGE syndrome patients.** RT-qPCR analysis of splicing events for *CD44*, *COL5A3*, *MICAL2* and *IFT74* in lymphoblastoid cell lines. Expression levels of variable regions were normalized with levels of corresponding constant regions (indicated between parentheses). Results for unaffected parents were combined and used as reference value for calculation of splicing fold change (red dashed line). Each graph depicts the results obtained for a given family (for each individual, n=9 from 3 independent experiments). Results for other families can be found in [Fig.5A-C](#), while detailed information about each patient can be found in [Table S8](#). \*  $P \leq 0.05$ , \*\*  $P \leq 0.01$ , \*\*\*  $P \leq 0.001$  (Student's *t*-test).

**Figure S13**

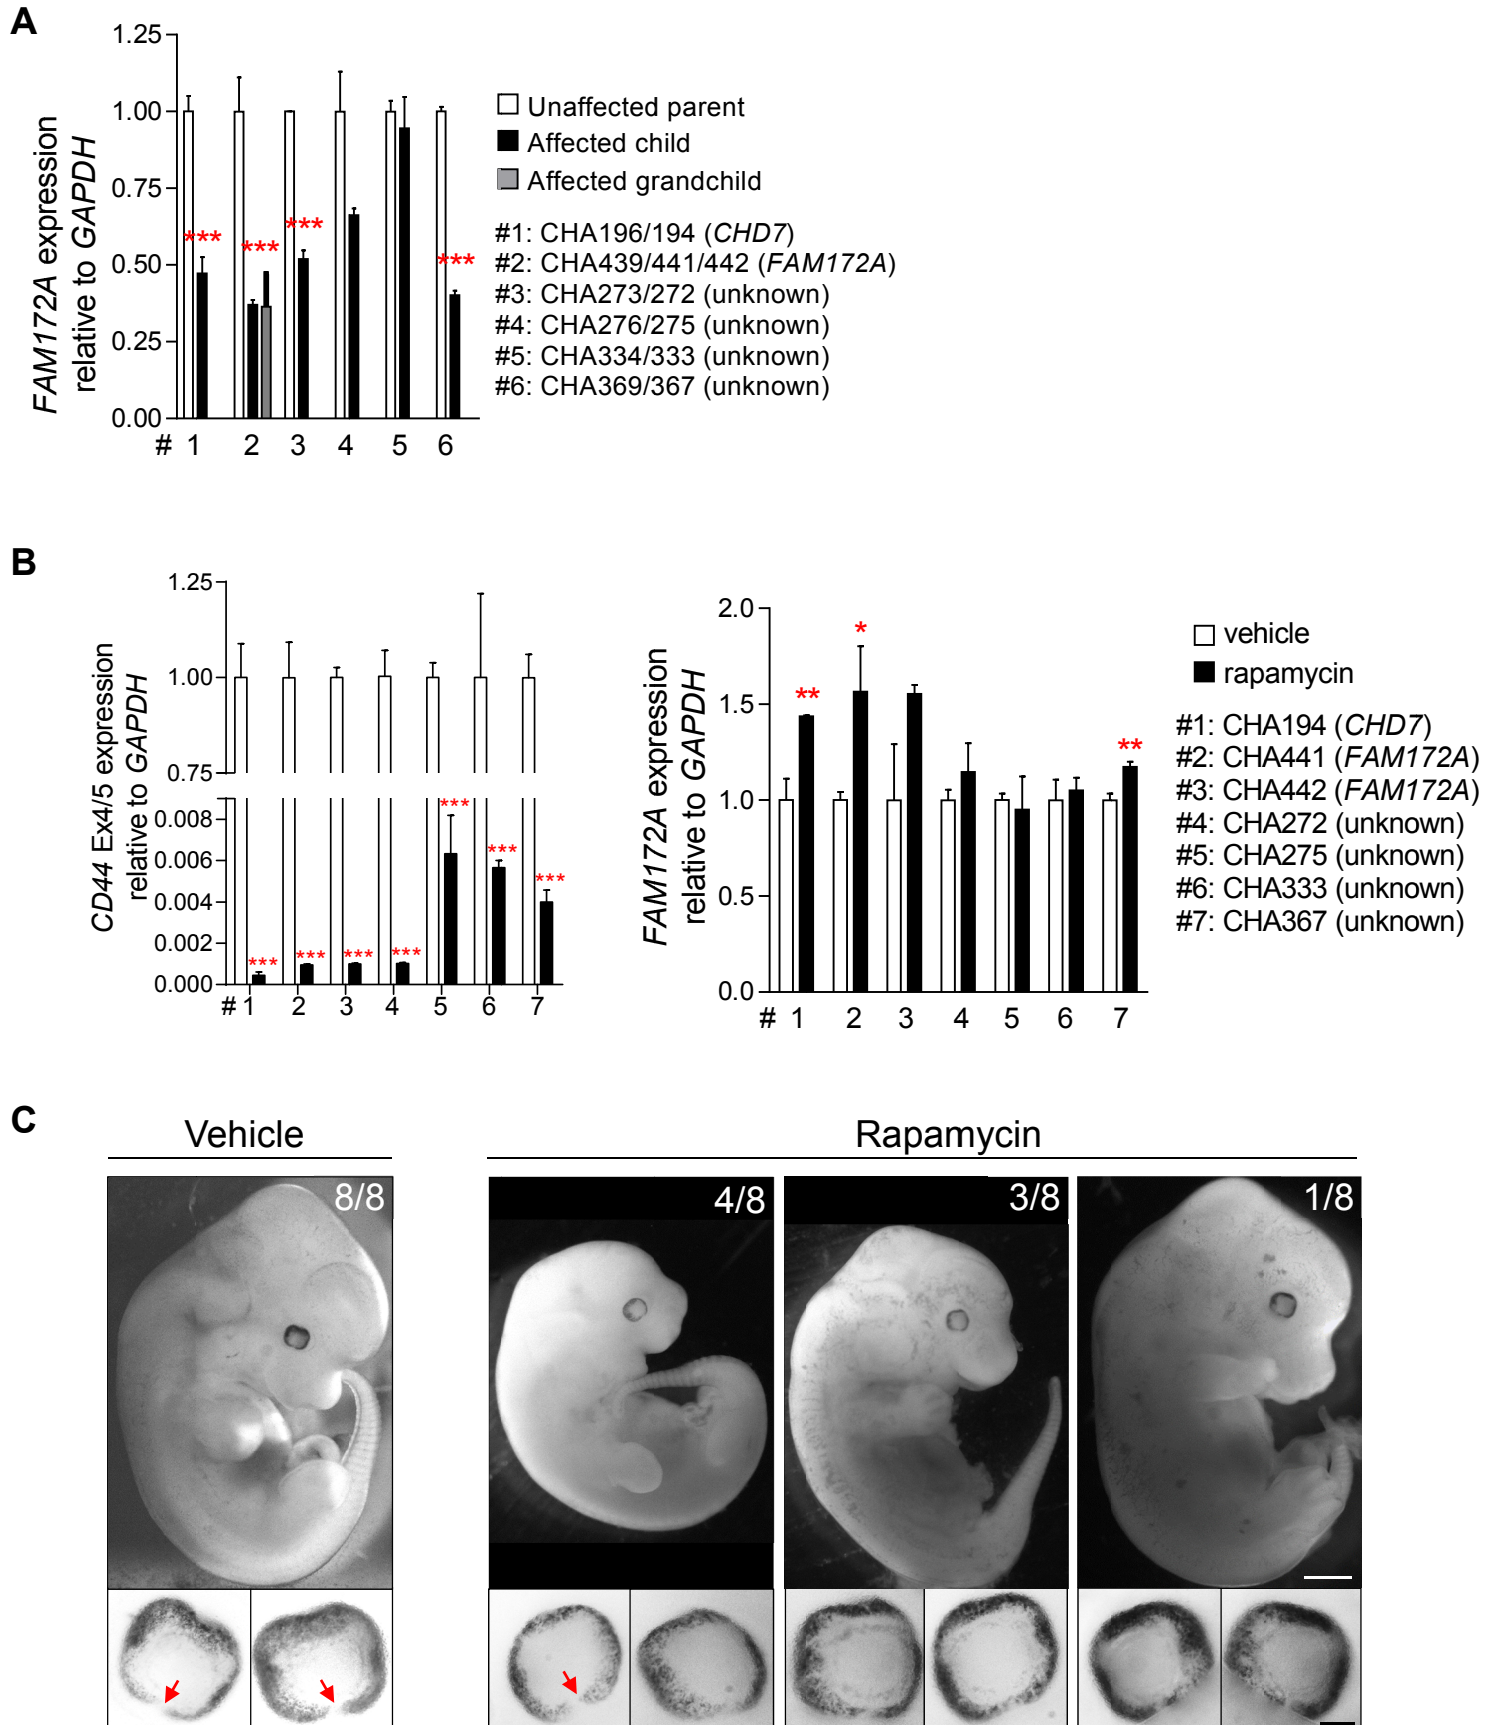

**Figure S13: Analysis of rapamycin effects in human LCLs and *Toupee*<sup>Tg/Tg</sup> mouse embryos. (A-B)** *GAPDH*-normalized RT-qPCR analyses of *FAM172A* and *CD44* expression in human LCLs derived from CHARGE patients and/or one of their unaffected parents, in absence (A) or presence (B) of rapamycin. The decreased expression of *CD44* constant exons 4-5 demonstrates the efficacy of the rapamycin treatment (left panel in B). Note that basal expression of *FAM172A* is generally lower in CHARGE patients and that rapamycin has very little effect on it (right panel in B). **(C)** Bright field images of e12.5 *Toupee*<sup>Tg/Tg</sup> embryos that were previously exposed to vehicle (20% ethanol) or rapamycin (1mg/kg) for 3 days *in utero* (n=8 embryos per condition). Exposition to rapamycin decreased the incidence of coloboma (red arrows in bottom panels), while it also increased the incidence of growth retardation and malformation/resorption. The ratios displayed in the top right corner of top panels refer to the number of embryos with similar morphology, which is not correlated with their ocular phenotype. Scale bar, 1mm (whole embryos) or 50µm (eyes).

**Figure S14**

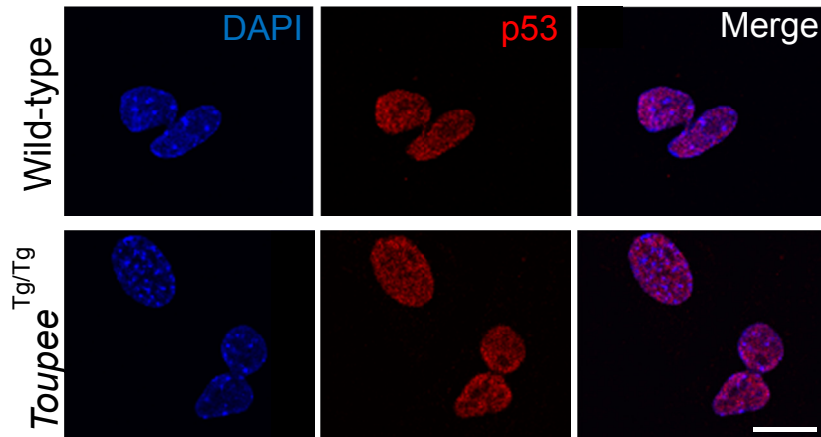

**Figure S14: p53 expression appears unaffected in *Toupee*<sup>Tg/Tg</sup> embryos.** Immunofluorescence analysis of p53 protein distribution in dissociated cells from WT and *Toupee*<sup>Tg/Tg</sup> e10.5 embryos. Neither the expression levels of p53 nor its localization appears affected in *Toupee*<sup>Tg/Tg</sup> cells. Scale bar, 10 $\mu$ m

**Table S1: Overview of major and minor features of CHARGE syndrome in *Toupee*<sup>Tg/Tg</sup> mice**

|                   | <b>Abnormality</b>                                | <b>Frequency</b>                    |            |
|-------------------|---------------------------------------------------|-------------------------------------|------------|
| Major             | Coloboma of the eye                               | 86% (n=14) <sup>a</sup>             |            |
|                   | Inner ear defects (circling behavior)             | 67% (n=61)                          |            |
|                   | Cleft palate                                      | 21% (n=14)                          |            |
| Minor             | Heart malformation (left ventricular hypertrophy) | 80% (n=10)                          |            |
|                   | Cranial nerve anomalies (VII, IX and/or X)        | 60% (n=10)                          |            |
|                   | Retardation of growth                             | 61% (n=61)                          |            |
|                   | Genital abnormalities                             | Males (cryptorchidism)              | 52% (n=27) |
|                   |                                                   | Females (hypoplastic uterine horns) | 58% (n=12) |
|                   | Thymus hypoplasia                                 | 36% (n=22)                          |            |
|                   | Olfactory bulb hypoplasia                         | 30% (n=10)                          |            |
|                   | Craniofacial malformations                        | Delayed closure of fontanelles      | 30% (n=10) |
|                   |                                                   | Twisted skull                       | 18% (n=61) |
|                   |                                                   | Oropharyngeal atresia               | 16% (n=61) |
| Kidney hypoplasia | 8% (n=12)                                         |                                     |            |

**Note:** <sup>a</sup>10/14 unilateral, 2/14 bilateral.

**Table S2: *Toupee*<sup>Tg/Tg</sup> mice are subfertile**

| <b>Reproduction parameter</b>                     | <b>WT males<br/>WT females<br/>(n = 9 couples)</b> | <b><i>Toupee</i><sup>Tg/Tg</sup> males<br/>WT females<br/>(n = 10 couples)</b> | <b>WT males<br/><i>Toupee</i><sup>Tg/Tg</sup> females<br/>(n = 9 couples)</b> |
|---------------------------------------------------|----------------------------------------------------|--------------------------------------------------------------------------------|-------------------------------------------------------------------------------|
| <b>Average number of days before vaginal plug</b> | 1.33 ± 1.00                                        | 1.92 ± 0.79 <sup>n.s.</sup>                                                    | 7.73 ± 6.60*                                                                  |
| <b>Average number of pups per litter</b>          | 11.11 ± 1.76                                       | 7.44 ± 2.92**                                                                  | 7.00 ± 0.66*                                                                  |
| <b>Number of unproductive matings</b>             | 0                                                  | 1                                                                              | 5                                                                             |

**Note:** n.s. not significant; \**P*<0.05; \*\**P*<0.01.



**Table S3: Genetic interaction between *Toupee*<sup>Tg</sup> and *Chd7*<sup>Gt</sup> alleles**

| Genotype \ Phenotype                                  | <i>Chd7</i> <sup>Gt/+</sup><br>(n=29) <sup>a</sup> | <i>Toupee</i> <sup>Tg/+</sup><br>(n=32) <sup>b</sup> | <i>Toupee</i> <sup>Tg/+</sup> ; <i>Chd7</i> <sup>Gt/+</sup><br>(n=20) <sup>b</sup> |
|-------------------------------------------------------|----------------------------------------------------|------------------------------------------------------|------------------------------------------------------------------------------------|
| Frequency at birth (expected)                         | 49%<br>(50%)                                       | 62%<br>(50%)                                         | 38%<br>(50%)                                                                       |
| Weight at P25 (g)                                     | 11.40<br>± 2.01                                    | 13.26<br>± 2.14                                      | 6.69<br>± 2.56                                                                     |
| Premature postnatal death (≤P30)                      | 3%                                                 | 0%                                                   | 20%                                                                                |
| Circling behavior                                     | 27%                                                | 0%                                                   | 45%                                                                                |
| Male-to-female sex reversal (number of XY)            | 12%<br>(16)                                        | 0%<br>(15)                                           | 33%<br>(12)                                                                        |
| Width of choroidal fissure at e12.5 (µm) <sup>c</sup> | 10.32<br>± 8.16                                    | 4.23<br>± 7.40                                       | 26.37<br>± 27.31                                                                   |

Note: <sup>a</sup> From *Chd7*<sup>Gt/+</sup> X WT FVB/N crosses

<sup>b</sup> From *Chd7*<sup>Gt/+</sup> X *Toupee*<sup>Tg/Tg</sup> crosses

<sup>c</sup> n=16 for *Chd7*<sup>Gt/+</sup> and 34 for the others

**Table S4: Dysregulation of the NCC gene regulatory network in *Toupee*<sup>Tg/Tg</sup> NCCs**

| Category                                    | Gene name                                                                                                                                                                       |
|---------------------------------------------|---------------------------------------------------------------------------------------------------------------------------------------------------------------------------------|
| Effectors of neural crest induction signals | <i>Lef1, Lrp5, Fzd3, Fzd5*, Fzd7, Bmpr1a, Bmpr2, Smad1, Smad5, Notch1, Notch2, Notch3, Dll1, Hes5</i>                                                                           |
| Neural crest specifiers                     | <i>Sox8, Sox10, Tfp2a, Tfp2b, Tfp2c, Pax3, Mycn, Meis3, Dnmt3a, Dnmt3b, Ets1, Cited4*, Nr2f2, Tead1, Tead2</i>                                                                  |
| Neural crest AP patterning                  | <i>Ednra, Hoxb2, Hoxa3, Hoxb5</i>                                                                                                                                               |
| Neural crest EMT and migration              | <i>Lims1*, Cdh2, Cdh6, Mmp14, Adam10*, Rxrg, Gja1, Vangl1*, Vangl2, Prickle1, Prickle2, Daam2, Ptk7, Celsr1, Celsr2, Celsr3, Erbb2, Erbb3, Erbb4</i>                            |
| Neural crest pathfinding                    | <i>Ephb3, Epha7, Ephb2, Ephb4, Epha8*, Efn5, Nrp1, Nrp2, Plxna1, Plxna3, Plxna4, Plxnb1, Plxnc1, Sema3b, Sema3d, Sema3g, Sema4c, Sema4g, Sema6a, Robo1, Robo2, Slit2, Slit3</i> |
| Craniofacial differentiation                | <i>Sox5, Alx3, Rara</i>                                                                                                                                                         |
| Melanocyte differentiation                  | <i>Mitf, Tyr, Dct, Mef2c, Kit, Nf1, Ctbp2</i>                                                                                                                                   |
| Neuronal differentiation                    | <i>Phox2b, Phox2a, Hand2, Ascl1, Th, Dbh, Runx1*</i>                                                                                                                            |
| Glial differentiation                       | <i>Plp1, Fabp7, Rela*</i>                                                                                                                                                       |
| Enteric nervous system                      | <i>Ednrb, Ret, Gfra1, Gfra2, Gfra3, Foxo3*, L1cam, Dcc, Kif26a, Lgi4, Prokr1*</i>                                                                                               |

Note: Genes included were those whose expression was modulated at least 1.5-fold ( $P \leq 0.01$ ). Asterisks indicate upregulated genes.

**Table S5: Fam172a interacting proteins in the chromatin fraction of Neuro2a cells**

| Category                       | Protein name                                                           | Gene name  | Accession number | MW (kDa) | emPAI         |
|--------------------------------|------------------------------------------------------------------------|------------|------------------|----------|---------------|
| <b>Histones</b>                | Histone H4                                                             | Hist1h4a   | P62806           | 11       | <b>10,000</b> |
|                                | Histone H3.2                                                           | Hist1h3b   | P84228           | 15       | <b>5,640</b>  |
|                                | Histone H2A type 2-A                                                   | Hist2h2aa1 | Q6GSS7           | 14       | <b>5,143</b>  |
|                                | Core histone macro-H2A.1                                               | H2afy      | Q9QZQ8           | 39       | <b>2,480</b>  |
|                                | Histone H2AX                                                           | H2afx      | P27661           | 15       | <b>1,577</b>  |
|                                | Histone H1.5                                                           | Hist1h1b   | P43276           | 22       | <b>1,415</b>  |
|                                | Histone H1.1                                                           | Hist1h1a   | P43275           | 21       | <b>1,167</b>  |
|                                | Histone H1.3                                                           | Hist1h1d   | P43277           | 22       | <b>0,716</b>  |
|                                | Histone H1.2                                                           | Hist1h1c   | P15864           | 21       | <b>0,673</b>  |
|                                | Histone H1.4                                                           | Hist1h1e   | P43274           | 21       | <b>0,598</b>  |
|                                | H1 histone family, member X                                            | H1fx       | Q80ZM5           | 20       | <b>0,149</b>  |
|                                | Histone H1.0                                                           | H1f0       | P10922           | 20       | <b>0,126</b>  |
| <b>Histone regulators</b>      | Histone-binding protein RBBP7                                          | Rbbp7      | Q60973           | 47       | <b>0,138</b>  |
|                                | Histone-lysine N-methyltransferase ASH1L                               | Ash1l      | Q99MY8           | 331      | <b>0,082</b>  |
|                                | Histone deacetylase 2                                                  | Hdac2      | P70288           | 55       | <b>0,068</b>  |
|                                | Histone deacetylase 7                                                  | Hdac7      | Q8C2B3           | 101      | <b>0,046</b>  |
|                                | Histone-lysine N-methyltransferase EHMT2                               | Ehmt2      | Q9Z148           | 138      | <b>0,013</b>  |
|                                | JmjC domain-containing histone demethylation protein 2C                | Jmjd1c     | Q69ZK6           | 260      | <b>0,003</b>  |
| <b>Other chromatin factors</b> | Regulator of chromosome condensation                                   | Rcc1       | Q8VE37           | 44       | <b>0,374</b>  |
|                                | FACT complex subunit SSRP1                                             | Ssrp1      | Q08943           | 81       | <b>0,137</b>  |
|                                | Heterochromatin protein 1-binding protein 3                            | Hp1bp3     | Q3TEA8           | 60       | <b>0,013</b>  |
|                                | DNA replication licensing factor MCM5                                  | Mcm5       | P49718           | 82       | <b>0,009</b>  |
| <b>mRNA splicing</b>           | Serine/arginine-rich splicing factor 1                                 | Srsf1      | Q6PDM2           | 27       | <b>1,410</b>  |
|                                | Heterogeneous nuclear ribonucleoprotein A/B                            | Hnrnpab    | Q99020           | 30       | <b>0,796</b>  |
|                                | Heterogeneous nuclear ribonucleoprotein K                              | Hnrnpk     | P61979           | 50       | <b>0,698</b>  |
|                                | Heterogeneous nuclear ribonucleoprotein D0                             | Hnrnpd     | Q60668           | 38       | <b>0,314</b>  |
|                                | Heterogeneous nuclear ribonucleoproteins C1/C2                         | Hnrnpc     | Q9Z204           | 34       | <b>0,303</b>  |
|                                | Polypyrimidine tract-binding protein 1                                 | Ptbp1      | P17225           | 56       | <b>0,183</b>  |
|                                | Serine/arginine-rich splicing factor 7                                 | Srsf7      | Q8BL97           | 30       | <b>0,083</b>  |
|                                | ELAV-like protein 1                                                    | Elavl1     | P70372           | 36       | <b>0,075</b>  |
|                                | NHP2-like protein 1                                                    | Nhp2l1     | E9PZS4           | 5        | <b>0,055</b>  |
|                                | RNA-binding protein FUS                                                | Fus        | P56959           | 52       | <b>0,048</b>  |
|                                | Intron-binding protein aquarius                                        | Aqr        | Q8CFQ3           | 170      | <b>0,011</b>  |
| <b>RNA processing</b>          | Ribosomal L1 domain-containing protein 1                               | Rsl1d1     | Q8BVY0           | 50       | <b>0,242</b>  |
|                                | Pumilio domain-containing protein KIAA0020                             | Kiaa0020   | Q8BKS9           | 72       | <b>0,051</b>  |
|                                | U3 small nucleolar RNA-associated protein 18 homolog                   | Utp18      | Q5SSI6           | 61       | <b>0,012</b>  |
| <b>Ribosome biogenesis</b>     | 40S ribosomal protein S3                                               | Rps3       | P62908           | 26       | <b>2,542</b>  |
|                                | Nucleophosmin                                                          | Npm1       | Q61937           | 32       | <b>2,540</b>  |
|                                | Nucleolin                                                              | Ncl        | P09405           | 76       | <b>0,975</b>  |
|                                | 60S ribosomal protein L18a                                             | Rpl18a     | P62717           | 20       | <b>0,700</b>  |
|                                | 60S ribosomal protein L5                                               | Rpl5       | P47962           | 34       | <b>0,325</b>  |
|                                | 60S ribosomal protein L6                                               | Rpl6       | P47911           | 33       | <b>0,311</b>  |
|                                | Nucleolar transcription factor 1                                       | Ubtf       | P25976           | 89       | <b>0,132</b>  |
|                                | 40S ribosomal protein S25                                              | Rps25      | P62852           | 13       | <b>0,129</b>  |
|                                | 60S ribosomal protein L22                                              | Rpl22      | P67984           | 14       | <b>0,053</b>  |
|                                | 60S ribosomal protein L19                                              | Rpl19      | P84099           | 23       | <b>0,033</b>  |
| <b>GTPase-related proteins</b> | GTP-binding nuclear protein Ran                                        | Ran        | P62827           | 24       | <b>0,430</b>  |
|                                | GTP-binding protein Di-Ras2                                            | Diras2     | Q5PR73           | 22       | <b>0,076</b>  |
|                                | Arf-GAP with SH3 domain, ANK repeat and PH domain-containing protein 2 | Asap2      | Q7SIG6           | 106      | <b>0,016</b>  |

|                                         |                                                     |         |        |     |              |
|-----------------------------------------|-----------------------------------------------------|---------|--------|-----|--------------|
| <b>Cytoskeleton-associated proteins</b> | Actin, cytoplasmic 1                                | Actb    | P60710 | 41  | <b>1,141</b> |
|                                         | Neuronal migration protein doublecortin             | Dcx     | O88809 | 40  | <b>0,256</b> |
|                                         | Junction plakoglobin                                | Jup     | Q02257 | 81  | <b>0,155</b> |
|                                         | Echinoderm microtubule-associated protein-like 6    | Eml6    | Q5SQM0 | 217 | <b>0,008</b> |
|                                         | Desmoglein-1-alpha                                  | Dsg1a   | Q61495 | 114 | <b>0,007</b> |
| <b>Other</b>                            | Casein kinase II subunit alpha                      | Csnk2a1 | Q60737 | 45  | <b>0,247</b> |
|                                         | Elongation factor 1-alpha 1                         | Eef1a1  | P10126 | 50  | <b>0,087</b> |
|                                         | Glyceraldehyde-3-phosphate dehydrogenase            | Gapdh   | P16858 | 35  | <b>0,095</b> |
|                                         | Chymotrypsinogen B                                  | Ctrb1   | Q9CR35 | 27  | <b>0,062</b> |
|                                         | Voltage-dependent anion-selective channel protein 3 | Vdac3   | Q60931 | 30  | <b>0,053</b> |
|                                         | Sorting nexin-29                                    | Snx29   | Q9D3S3 | 91  | <b>0,031</b> |
|                                         | Stress-70 protein, mitochondrial                    | Hspa9   | P38647 | 73  | <b>0,021</b> |
|                                         | Fibrous sheath-interacting protein 2                | Fsip2   | A2ARZ3 | 784 | <b>0,019</b> |

**Note:** Proteins were included if enriched at least 1.5-fold in comparison to the MBP negative control and detected in at least two out of the three biological replicates of this analysis. The indicated emPAI (exponentially modified Protein Abundance Index) value corresponds to the average of the three biological replicates. Accession number is for the Uniprot database.

**Table S6: Fam172a interacting proteins in the nucleoplasm fraction of Neuro2a cells**

| Category                                | Protein name                                     | Gene name | Accession number | MW  | emPAI        |
|-----------------------------------------|--------------------------------------------------|-----------|------------------|-----|--------------|
| <b>RNA binding /processing</b>          | Lupus La protein homolog                         | Ssb       | P32067           | 47  | <b>0,217</b> |
|                                         | ATP-dependent RNA helicase A                     | Dhx9      | O70133           | 149 | <b>0,090</b> |
|                                         | Nucleoprotein TPR                                | Tpr       | F6ZDS4           | 273 | <b>0,053</b> |
|                                         | Exosome complex component MTR3                   | Exosc6    | Q8BTW3           | 28  | <b>0,039</b> |
|                                         | tRNA (cytosine(34)-C(5))-methyltransferase       | Nsun2     | Q1HFZ0           | 85  | <b>0,030</b> |
|                                         | DAZ-associated protein 1                         | Dazap1    | Q9JII5           | 43  | <b>0,025</b> |
|                                         | Heterogeneous nuclear ribonucleoprotein Q        | Syncrip   | Q7TMK9           | 69  | <b>0,016</b> |
|                                         | Bifunctional glutamate/proline--tRNA ligase      | Eprs      | Q8CGC7           | 170 | <b>0,008</b> |
| <b>mRNA splicing</b>                    | Nuclease-sensitive element-binding protein 1     | Ybx1      | P62960           | 35  | <b>0,130</b> |
|                                         | Serine/arginine-rich splicing factor 3           | Srsf3     | P84104           | 19  | <b>0,114</b> |
|                                         | Pre-mRNA-splicing regulator WTAP                 | Wtap      | Q9ER69           | 44  | <b>0,084</b> |
|                                         | Interleukin enhancer-binding factor 2            | Ilf2      | Q9CXY6           | 43  | <b>0,080</b> |
|                                         | TAR DNA-binding protein 43                       | Tardbp    | Q921F2           | 44  | <b>0,039</b> |
|                                         | RNA-binding protein FUS                          | Fus       | P56959           | 52  | <b>0,021</b> |
|                                         | Far upstream element-binding protein 2           | Khsrp     | Q3U0V1           | 76  | <b>0,018</b> |
| <b>DNA binding/repair</b>               | Histone-binding protein RBBP7                    | Rbbp7     | Q60973           | 47  | <b>0,173</b> |
|                                         | Superoxide dismutase [Cu-Zn]                     | Sod1      | P08228           | 15  | <b>0,140</b> |
|                                         | DNA damage-binding protein 1                     | Ddb1      | Q3U1J4           | 126 | <b>0,029</b> |
|                                         | DNA dC->dU-editing enzyme APOBEC-3               | Apobec3   | Q99J72           | 50  | <b>0,023</b> |
|                                         | Tyrosine-protein kinase BAZ1B                    | Baz1b     | Q9Z277           | 170 | <b>0,018</b> |
|                                         | Tumor suppressor p53-binding protein 1           | Tp53bp1   | P70399           | 211 | <b>0,002</b> |
| <b>Cytoskeleton-associated proteins</b> | Tubulin beta-5 chain                             | Tubb5     | P99024           | 49  | <b>0,546</b> |
|                                         | MARCKS-related protein                           | Marcksl1  | P28667           | 20  | <b>0,088</b> |
|                                         | Peripherin                                       | Prph      | P15331           | 53  | <b>0,083</b> |
|                                         | WD repeat-containing protein 1                   | Wdr1      | O88342           | 66  | <b>0,064</b> |
|                                         | Drebrin                                          | Dbn1      | Q9QXS6           | 77  | <b>0,021</b> |
|                                         | Echinoderm microtubule-associated protein-like 6 | Eml6      | Q5SQM0           | 217 | <b>0,005</b> |
|                                         | Spectrin beta chain, non-erythrocytic 1          | Sptbn1    | Q62261           | 274 | <b>0,004</b> |
|                                         | Microtubule-actin cross-linking factor 1         | Macf1     | Q9QXZ0           | 831 | <b>0,001</b> |
| <b>Other</b>                            | Leukocyte elastase inhibitor B                   | Serp1nb1b | Q8VHP7           | 42  | <b>1,870</b> |
|                                         | Elongation factor 1-alpha 1                      | Eef1a1    | P10126           | 50  | <b>0,360</b> |
|                                         | ATP synthase subunit alpha                       | Atp5a1    | Q03265           | 59  | <b>0,299</b> |
|                                         | GTP-binding protein Di-Ras2                      | Diras2    | Q5PR73           | 22  | <b>0,285</b> |
|                                         | 40S ribosomal protein S3                         | Rps3      | P62908           | 26  | <b>0,233</b> |
|                                         | Malate dehydrogenase, mitochondrial              | Mdh2      | P08249           | 35  | <b>0,165</b> |
|                                         | Fibrous sheath-interacting protein 2             | Fsip2     | A2ARZ3           | 784 | <b>0,110</b> |
|                                         | Myristoylated alanine-rich C-kinase substrate    | Marcks    | P26645           | 29  | <b>0,061</b> |
|                                         | Asparagine synthetase                            | Asns      | Q61024           | 64  | <b>0,037</b> |
|                                         | E3 ubiquitin-protein ligase TRIM8                | Trim8     | Q99PJ2           | 61  | <b>0,019</b> |
|                                         | Teneurin-1                                       | Tenm1     | Q9WTS4           | 305 | <b>0,003</b> |

**Note:** Proteins were included if enriched at least 1.5-fold in comparison to the MBP negative control and detected in at least two out of the three biological replicates of this analysis. The indicated emPAI (exponentially modified Protein Abundance Index) value corresponds to the average of the three biological replicates. Accession number is for the Uniprot database.

**Table S7: Fam172a interacting proteins in the cytoplasm fraction of Neuro2a cells**

| <b>Category</b>                         | <b>Protein name</b>                                                    | <b>Gene name</b>       | <b>Accession number</b> | <b>MW</b> | <b>emPAI</b> |
|-----------------------------------------|------------------------------------------------------------------------|------------------------|-------------------------|-----------|--------------|
| <b>RNA binding /processing</b>          | Bifunctional glutamate/proline--tRNA ligase                            | Eprs                   | Q8CGC7                  | 170       | <b>0,259</b> |
|                                         | Nuclease-sensitive element-binding protein 1                           | Ybx1                   | P62960                  | 36        | <b>0,148</b> |
|                                         | Eukaryotic translation initiation factor 2 subunit 1                   | Eif2s1                 | Q6ZWX6                  | 36        | <b>0,039</b> |
|                                         | RNA-binding protein FUS                                                | Fus                    | P56959                  | 52        | <b>0,015</b> |
|                                         | Squamous cell carcinoma antigen recognized by T-cells 3                | Sart3                  | Q9JLI8                  | 109       | <b>0,007</b> |
| <b>Nucleotide binding /processing</b>   | ATP synthase subunit beta, mitochondrial                               | Atp5b                  | P56480                  | 56        | <b>1,565</b> |
|                                         | ADP/ATP translocase 1                                                  | Slc25a4                | P48962                  | 32        | <b>1,384</b> |
|                                         | Nucleoside diphosphate kinase A                                        | Nme1                   | P15532                  | 17        | <b>1,307</b> |
|                                         | High mobility group protein B2                                         | Hmgb2                  | P30681                  | 24        | <b>0,523</b> |
|                                         | ADP/ATP translocase 2                                                  | Slc25a5                | P51881                  | 286       | <b>0,518</b> |
|                                         | Up-regulated during skeletal muscle growth protein 5                   | Usmg5                  | Q78IK2                  | 5         | <b>0,410</b> |
|                                         | ATP synthase subunit gamma, mitochondrial                              | Atp5c1                 | Q91VR2                  | 32        | <b>0,126</b> |
|                                         | GTP-binding protein Di-Ras2                                            | Diras2                 | Q5PR73                  | 22        | <b>0,074</b> |
|                                         | 5'-AMP-activated protein kinase catalytic subunit alpha-1              | Prkaa1                 | Q5EG47                  | 63        | <b>0,048</b> |
|                                         | Arf-GAP with SH3 domain, ANK repeat and PH domain-containing protein 2 | Asap2                  | Q7SIG6                  | 106       | <b>0,015</b> |
| <b>Protein processing /repair</b>       | Peptidyl-prolyl cis-trans isomerase A                                  | Ppia                   | P17742                  | 17        | <b>6,238</b> |
|                                         | Prohibitin                                                             | Phb                    | P67778                  | 29        | <b>2,208</b> |
|                                         | Elongation factor 1-alpha 1                                            | Eef1a1                 | P10126                  | 50        | <b>1,083</b> |
|                                         | Prohibitin-2                                                           | Phb2                   | O35129                  | 33        | <b>0,825</b> |
|                                         | Elongation factor 2                                                    | Eef2                   | P58252                  | 95        | <b>0,624</b> |
|                                         | Elongation factor 1-gamma                                              | Eef1g                  | Q9D8N0                  | 44        | <b>0,465</b> |
|                                         | T-complex protein 1 subunit alpha                                      | Tcp1                   | P11983                  | 60        | <b>0,345</b> |
|                                         | Aminoacyl tRNA synthase complex-interacting multifunctional protein 2  | Aimp2                  | Q8R010                  | 35        | <b>0,249</b> |
|                                         | Thioredoxin                                                            | Txn                    | P10639                  | 11        | <b>0,238</b> |
|                                         | Prolyl endopeptidase                                                   | Prep                   | Q9QUR6                  | 80        | <b>0,191</b> |
|                                         | 26S protease regulatory subunit 6B                                     | Psmc4                  | P43686                  | 47        | <b>0,058</b> |
|                                         | Transcription factor BTF3                                              | Btf3                   | Q64152                  | 22        | <b>0,057</b> |
|                                         | Alpha-2-HS-glycoprotein                                                | Ahsg                   | P29699                  | 37        | <b>0,028</b> |
| <b>Metabolic processes</b>              | Glyceraldehyde-3-phosphate dehydrogenase                               | Gapdh                  | P16858                  | 35        | <b>1,586</b> |
|                                         | L-lactate dehydrogenase A chain                                        | Ldha                   | P06151                  | 36        | <b>1,005</b> |
|                                         | Aspartate aminotransferase, mitochondrial                              | Got2                   | P05202                  | 47        | <b>0,767</b> |
|                                         | Glucose-6-phosphate isomerase                                          | Gpi                    | P06745                  | 62        | <b>0,412</b> |
|                                         | Bifunctional purine biosynthesis protein PURH                          | Atic                   | Q9CWJ9                  | 65        | <b>0,298</b> |
|                                         | D-3-phosphoglycerate dehydrogenase                                     | Phgdh                  | Q61753                  | 56        | <b>0,290</b> |
|                                         | Fatty acid-binding protein, epidermal                                  | Fabp5                  | Q05816                  | 15        | <b>0,255</b> |
|                                         | Malate dehydrogenase, cytoplasmic                                      | Mdh1                   | P14152                  | 36        | <b>0,190</b> |
|                                         | Inorganic pyrophosphatase                                              | Ppa1                   | Q9D819                  | 32        | <b>0,185</b> |
|                                         | Cytosolic acyl coenzyme A thioester hydrolase                          | Acot7                  | Q91V12                  | 42        | <b>0,164</b> |
|                                         | Dolichyl-diphosphooligosaccharide--protein glycosyltransferase         | Ddost                  | O54734                  | 49        | <b>0,115</b> |
|                                         | Dihydrolipoyllysine-residue succinyltransferase                        | Dlst                   | Q9D2G2                  | 48        | <b>0,086</b> |
|                                         | Glycogen phosphorylase, brain form                                     | Pygb                   | Q8CI94                  | 96        | <b>0,027</b> |
|                                         | Procollagen-lysine,2-oxoglutarate 5-dioxygenase 3                      | Plod3                  | Q9R0E1                  | 84        | <b>0,025</b> |
|                                         | <b>Cytoskeleton-associated proteins</b>                                | Clathrin heavy chain 1 | Cltc                    | Q68FD5    | 191          |
| T-complex protein 1 subunit gamma       |                                                                        | Cct3                   | P80318                  | 60        | <b>0,197</b> |
| Spectrin beta chain, non-erythrocytic 1 |                                                                        | Sptbn1                 | Q62261                  | 275       | <b>0,065</b> |
| Desmoplakin                             |                                                                        | Dsp                    | E9Q557                  | 332       | <b>0,046</b> |

|              |                                                     |           |        |    |              |
|--------------|-----------------------------------------------------|-----------|--------|----|--------------|
| <b>Other</b> | Leukocyte elastase inhibitor B                      | Serpinb1b | Q8VHP7 | 42 | <b>4,340</b> |
|              | 14-3-3 protein zeta/delta                           | Ywhaz     | P63101 | 27 | <b>1,015</b> |
|              | Voltage-dependent anion-selective channel protein 1 | Vdac1     | Q60932 | 32 | <b>0,519</b> |
|              | Macrophage migration inhibitory factor              | Mif       | P34884 | 15 | <b>0,480</b> |
|              | Voltage-dependent anion-selective channel protein 3 | Vdac3     | Q60931 | 30 | <b>0,306</b> |
|              | Voltage-dependent anion-selective channel protein 2 | Vdac2     | Q60930 | 31 | <b>0,113</b> |

**Note:** Proteins were included if enriched at least 1.5-fold in comparison to the MBP negative control and detected in at least two out of the three biological replicates of this analysis. The indicated emPAI (exponentially modified Protein Abundance Index) value corresponds to the average of the three biological replicates. Accession number is for the Uniprot database.

**Table S8: Genetic and phenotypic information about the CHARGE syndrome patients included in this study**

| <b>Patient ID (sex)</b>                  | <b>CHD7 variant</b>         | <b>FAM172A variant</b>                               | <b>Possible transmission</b>                    | <b>Phenotypic presentation</b>                                                                                                                                        |
|------------------------------------------|-----------------------------|------------------------------------------------------|-------------------------------------------------|-----------------------------------------------------------------------------------------------------------------------------------------------------------------------|
| <b>CHA194</b><br>(XX female)             | NM_017780.3:<br>c.5050+1G>T | no                                                   | <i>De novo</i> dominant                         | Coloboma, choanal atresia, ear malformations, hearing loss, delayed puberty, short stature                                                                            |
| <b>CHA272</b><br>(XY male)               | no                          | no                                                   | Recessive or <i>de novo</i> dominant            | Coloboma, choanal atresia, ear malformation, hearing loss, heart malformation, swallowing problems, developmental delay                                               |
| <b>CHA275</b><br>(XX female)             | no                          | no                                                   | Recessive or <i>de novo</i> dominant            | Choanal atresia, Mondini malformation, hearing loss, growth retardation, swallowing problems                                                                          |
| <b>CHA333</b><br>(XX female)             | no                          | no                                                   | Recessive or <i>de novo</i> dominant            | Coloboma, choanal stenosis, hearing loss, ear malformation, heart malformation, short stature, swallowing problems                                                    |
| <b>CHA367</b><br>(XX female)             | no                          | no                                                   | Recessive or <i>de novo</i> dominant            | Coloboma, hypoplastic optic nerves, unilateral choanal atresia, ear malformation, heart malformation, short stature, agenesis of corpus callosum, swallowing problems |
| <b>CHA441<sup>a</sup></b><br>(XX female) | no                          | NM_032042.5:<br>c.682G>C                             | <i>De novo</i> dominant                         | Choanal atresia, small abnormal ears, moderate hearing loss, vestibular dysfunction                                                                                   |
| <b>CHA442<sup>a</sup></b><br>(XX female) | no                          | NM_032042.5:<br>c.682G>C<br>NM_032042.5:<br>c.916C>T | Inherited from mother / <i>De novo</i> dominant | Choanal atresia, profound hearing loss, small left kidney, genital hypoplasia, delayed puberty, growth retardation, growth hormone deficiency, hypothyroidism         |

**Note:** <sup>a</sup> Mother (CHA441) and child (CHA442) from the same family.

**Table S9: Genetic and phenotypic information about the FAM172A mutation-positive mother-child pair from the replication cohort**

| <b>Family member</b> | <b>CHD7 variant</b> | <b>FAM172A variant</b>   | <b>Possible transmission</b> | <b>CHARGE syndrome-related features</b>                                                                                                     |
|----------------------|---------------------|--------------------------|------------------------------|---------------------------------------------------------------------------------------------------------------------------------------------|
| <b>Mother</b>        | no                  | NM_032042.5:<br>c.682G>C | <i>De novo</i> dominant      | Choanal atresia, blocked tear ducts, severe hearing loss, growth hormone deficiency, hydronephrotic left kidney, hypothyroidism             |
| <b>Child</b>         | no                  | NM_032042.5:<br>c.682G>C | Inherited from mother        | Choanal atresia, blocked tear ducts, strabismus, abnormal ears, severe hearing loss, developmental delay, immune deficiency, hypothyroidism |

**Table S10: Antibodies used in this study**

|                             | <b>Antibody Name</b>                    | <b>Dilution</b>                            | <b>Source</b>                            | <b>RRID</b> |
|-----------------------------|-----------------------------------------|--------------------------------------------|------------------------------------------|-------------|
| <b>Primary Antibodies</b>   | Rabbit molyclonal Anti-Fam172a          | WB (1:1000)<br>IF (1:500)<br>IP (2 µg/ml)  | Abcam ab121364                           | AB_11127114 |
|                             | Rat monoclonal Anti-AGO2                | IF(1:1000)                                 | Sigma SAB4200085                         | AB_10600719 |
|                             | Rat monoclonal Anti-AGO1                | WB (1:1000)<br>IF (1:1000)<br>IP (3 µg/ml) | Sigma SAB4200084                         | AB_10602786 |
|                             | Rabbit monoclonal Anti-CHD7 (D3F5)      | WB (1:1000)<br>IP (3 µg/ml)                | Cell Signaling #6505                     | AB_11220431 |
|                             | Rabbit polyclonal Anti-AGO2             | WB (1:1000)<br>IF (1:500)<br>IP (3 µg/ml)  | Abcam ab32381                            | AB_867543   |
|                             | Rabbit polyclonal Anti-Active Caspase 3 | IF (1:500)                                 | Abcam ab13847                            | AB_443014   |
|                             | Goat polyclonal Anti-Sox10              | IF (1:250)                                 | Santa Cruz Sc-17342                      | AB_2195374  |
|                             | Mouse monoclonal Anti-Neurofilament     | IHC (1:500)                                | DSHB 2H3                                 | AB_2618380  |
|                             | Rabbit polyclonal Anti-H3               | WB (1:2500)<br>IP (1 µg/ml)                | Abcam ab1791                             | AB_302613   |
|                             | Rabbit polyclonal Anti-Ki67             | IF (1:1000)                                | Abcam ab15580                            | AB_443209   |
|                             | Mouse monoclonal Anti-p53               | IF (1:250)                                 | Cell Signaling #2524<br>(1C12)           | AB_331743   |
|                             | Mouse monoclonal Anti-Myc tag           | WB (1:500)<br>IF (1:100)                   | In house hybridoma<br>(9E10)             | -           |
| <b>Secondary Antibodies</b> | Donkey Alexa Fluor 488 Anti-Rat IgG     | IF (1:500)                                 | Jackson<br>ImmunoResearch<br>712-545-150 | AB_2340683  |
|                             | Donkey Alexa Fluor 594 Anti-Rabbit IgG  | IF (1:500)                                 | Jackson<br>ImmunoResearch<br>711-585-152 | AB_2340621  |
|                             | Donkey Alexa Fluor 647 Anti-Mouse IgG   | IF (1:500)                                 | Jackson<br>ImmunoResearch<br>715-605-150 | AB_2340862  |
|                             | Bovine Alexa Fluor 647 Anti-Goat IgG    | IF (1:500)                                 | Jackson<br>ImmunoResearch<br>805-605-180 | AB_2340885  |
|                             | Donkey Anti-Rabbit IgG HRP              | WB (1:10 000)                              | AbD Serotec Star124p                     | AB_615912   |
|                             | Donkey Anti-Mouse IgG HRP               | WB (1:10 000)                              | AbD Serotec Star117                      | AB_324488   |
|                             | Goat Anti-Rat IgG HRP                   | WB (1:10 000)                              | Santa Cruz Sc-2032                       | AB_631755   |

**Table S11: Oligonucleotide primers used for RT-qPCR**

| <b>Oligo Name</b>        | <b>Sequence (5'-3')</b>                     |
|--------------------------|---------------------------------------------|
| Fam172a Forward          | AGG TGA CTG CTG TGG CAT TGA C               |
| Fam172a Reverse          | GGC TTC TGC GAG CTG CTC TT                  |
| FAM172A Forward          | ACC GCC TCT TGA TTT TCC TGA                 |
| FAM172A Reverse          | GCC TCG TAT CTT TTC TGG TTC C               |
| Nr2f1 Forward            | CTT TCA GGA ACA GGT GGA GAA GC              |
| Nr2f1 Reverse            | AGG AAC ACT GGA TGG ACA TGT AAG G           |
| A830082K12Rik Forward    | TTC AAT AGT TCT GCT GAA TGC TCC             |
| A830082K12Rik Reverse    | ATA AAG TAG GGA TCC GTT TCC AGT TGT GTC AAC |
| Pou5f2 Forward           | AGT GTG GTT TTC TAA CCG GAG CCA             |
| Pou5f2 Reverse           | TCA GAG AAC TGA ACG CTA ACC CTG             |
| Gapdh Forward            | CTG TGG CGT GAT GGC CGT GG                  |
| Gapdh Reverse            | CCT CAG TGT AGC CCA AGA TG                  |
| Cd44_ Ex8 (v4) Forward   | TAC CCC AGT TTT TCT GGA TCA GG              |
| Cd44_ Ex9 (v5) Reverse   | GCC ATC CTG GTG GTT GTC TG                  |
| CD44_ Ex7 (v4) Forward   | AGG CTG GGA GCC AAA TGA AG                  |
| CD44_ Ex8 (v5) Reverse   | CCG GAT TTG AAT GGC TTG GG                  |
| Cd44_ Ex13 (v9) Forward  | TGG AAG ACT TGA ACA GGA CAG G               |
| Cd44_ Ex14 (v10) Reverse | GTT TTC GTC TTC TTC CGG CTC                 |
| CD44_ Ex12 (v9) Forward  | GCT TCA GCC TAC TGC AAA TCC                 |
| CD44_ Ex13 (v10) Reverse | GCC TTC ATG TGA TGT AGA GAA GC              |
| Cd44_ Ex4 Forward        | ACA GAC CTA CCC AAT TCC TTC G               |
| _ Ex5 Reverse            | GGG TGC TCT TCT CGA TGG TG                  |
| CD44_ Ex4 Forward        | TGC CCA ATG CCT TTG ATG GAC                 |
| CD44_ Ex5 Reverse        | GAA GTG CTG CTC CTT TCA CTG                 |
| Cd44_ Ex16 Forward       | GGA GTT CCC GCA CTG TGA C                   |
| Cd44_ Ex17 Reverse       | GGT CTC CTC ATA GGA CCA GAA G               |
| CD44_ Ex16 Forward       | AGG TGG AGC AAA CAC AAC CTC                 |
| CD44_ Ex17 Reverse       | GAA TCA AAG CCA AGG CCA AGA G               |
| Col5a3_ EX6 Forward      | CCC CAA AGA CGA TGA ACC AG                  |
| Col5a3_ EX7 Reverse      | TCT CTG TCT CAG GGA TGT GGA                 |
| COL5A3_ EX6 Forward      | TCA AGT CCA CCT CCT GAC TCC                 |
| COL5A3_ EX7 Reverse      | TAG GAT CGT GGC ATT GAG TCC                 |
| Col5a3_ EX28 Forward     | TAC CTC TGG TAA CCG GGG TCT C               |
| Col5a3_ EX29 Reverse     | CCT TTT GGT CCC TCA TCA CCC                 |
| COL5A3_ EX28 Forward     | AGG GGG AGA AAG GCG AGA A                   |
| COL5A3_ EX29 Reverse     | CCT TTT GGT CCC TCA TCA CCC                 |
| Col5a3_ EX66 Forward     | GCA GCC CAT CAG AGG TTC AC                  |
| Col5a3_ EX67 Reverse     | AAG AGG GTC TTC GCC TGT CC                  |
| COL5A3_ EX66 Forward     | ACC TAC TCC TGC CAG AAT GC                  |



|                     |                                   |
|---------------------|-----------------------------------|
| COL5A3_EX67 Reverse | GGT CTT CGT CTG TCC TTT CCG       |
| Col5a3_EX10 Forward | GGA CAG CAG TTT GAG GGG           |
| Col5a3_EX11 Reverse | CAC GGT CCC CAG GGA AG            |
| COL5A3_EX10 Forward | GGG CAG CAG TTT GAG GGA C         |
| COL5A3_EX11 Reverse | GGG TCG CCA GGG AAT CCT           |
| Ift74_EX10 Forward  | ACA CTT CAG CAA CAG CTA GAT TC    |
| Ift74_EX11 Reverse  | GGC GAT CCC ATG CTT TTG TC        |
| IFT74_EX10 Forward  | TCA ACA ACA ATT GGA TTC ACA GAA C |
| IFT74_EX11 Reverse  | TGA TCT CGA TGG GAC TCC AAC       |
| Ift74_EX5 Forward   | TGT ACA ACC AAG AAA ATT CAG TGT   |
| Ift74_EX6 Reverse   | TGT TGT AGT CTG CTA GTT GTC CT    |
| IFT74_EX5 Forward   | TGT CAT ATG AAA AGA GGG CTG AG    |
| IFT74_EX6 Reverse   | TGT TGT AGT CTG CTA GTT GTC C     |
| Mical2_EX8 Forward  | GGA CAG TAC CCA CTA CTT TGT C     |
| Mical2_EX9 Reverse  | CCG AAC ACA GCA GCA TCT CT        |
| MICAL2_EX8 Forward  | CTG CTC GAC AAA GGT GTC ATC       |
| MICAL2_EX9 Reverse  | CGG GCA TAG GAT AGC AGG TT        |
| Mical2_EX18 Forward | CGG GTC TCA GGC ATA GGT AAG       |
| Mical2_EX19 Reverse | AGC CGG TAC TTG GTT GAG TTC       |
| MICAL2_EX24 Forward | CGT GTG TAC GTG ATG GAA CG        |
| MICAL2_EX25 Reverse | GCT TCA ACT CTG CCC GTC TC        |
| Mical2_EX3 Forward  | GTG GCA CAA ACT GGA TAA GCG       |
| Mical2_EX4 Reverse  | GCA GGA CAT TGT TCC GGG AG        |
| MICAL2_EX3 Forward  | CCT GGA AAG CCA AAG CCC TG        |
| MICAL2_EX4 Reverse  | GTT GTT CCG GGA GAA GGA GTC       |

**Table S12: Oligonucleotide primers used for mouse genotyping as well as for cloning and mutagenesis of *Fam172a***

|                                             | <b>Oligo Name</b>                  | <b>Sequence (5'-3')</b>                           |
|---------------------------------------------|------------------------------------|---------------------------------------------------|
| <b>Genotyping</b>                           | Fam172a_Mut_Forward                | GGG AGT AAG TCC TAC CAA TGT TAA ATC               |
|                                             | Fam172a_Mut_Reverse                | TGA CCT TCT AAA CAG TCC CAT ATC CCC               |
|                                             | Fam172a_WT_Forward                 | GAA GTG GGA ACA AAA CAC CCT TGG                   |
|                                             | Fam172a_WT_Reverse                 | CTA ATG AGT TTG GGG AAA TTA TCA TAG               |
|                                             | Chd7_WT/Mut_Forward                | GCT CGC TTT TCA ACC TCA TTA CG                    |
|                                             | Chd7_WT_Reverse                    | ATC AAC AAT GCC AAC CCA GGC                       |
|                                             | Chd7_Mut_Reverse                   | CCT CCG ATT GAC TGA GTC GC                        |
|                                             | Smcxy Forward                      | TGA AGC TTT TGG CTT TGA G                         |
|                                             | Smcxy Reverse                      | CCA CTG CCA AAT TCT TTG G                         |
|                                             | Zfy Forward                        | GAC CAG ATT GTT GTG GAA GTA CAA G                 |
|                                             | Zfy Reverse                        | CCA GTG TGT CTG AAG TGT CAG CTG                   |
|                                             | <b>Fam172a ORF and mutagenesis</b> | <i>Fam172a</i> ORF ( <i>Xho</i> I) Forward        |
| <i>Fam172a</i> ORF ( <i>Eco</i> RI) Reverse |                                    | GAA TTC TCA CAG CTC CTC GTG CTT GAT CC            |
| p.Glu229Gln (mut1_Arb2)                     |                                    | GGG AAG CGG <u>C</u> AA AGG AGA GAT AAG           |
| p.Arg307* (mut2_Arb2)                       |                                    | CTG ATG ATT CAA <u>I</u> GA GAA GCA GAT           |
| p.Ser294Ala (mut_hydrolase)                 |                                    | GTC CTC CAT AG <u>G</u> <u>C</u> AT GAG CCA CAA A |

---

## OTHER SUPPORTING INFORMATION

**Dataset S1: RNAseq data of *Toupee*<sup>Tg/Tg</sup> NCCs analyzed with edgeR and DESeq (3488 genes; FC ≥ 1.5; DESeq  $P \leq 0.01$ ).**

**Dataset S2: RNAseq data of *Toupee*<sup>Tg/Tg</sup> NCCs analyzed with rMATS (1166 events; inclusion level ≥ 0.1;  $P < 0.01$ ).**

**Sheet 1: Skipped exons (611 events)**

**Sheet 2: Retained introns (368 events)**

**Sheet 3: Alternative 3' splice site (91 events)**

**Sheet 4: Alternative 5' splice site (69 events)**

**Sheet 5: Mutually exclusive exons (27 events)**

**Dataset S3: RNAseq data of *Chd7*-het granule neuron progenitors analyzed with rMATS (227 events; inclusion level ≥ 0.1;  $P < 0.05$ ).**

**Sheet 1: Skipped exons (115 events)**

**Sheet 2: Retained introns (58 events)**

**Sheet 3: Alternative 3' splice site (26 events)**

**Sheet 4: Alternative 5' splice site (20 events)**

**Sheet 5: Mutually exclusive exons (8 events)**

**Dataset S4: RNAseq data of *Chd7*-null granule neuron progenitors analyzed with rMATS (253 events; inclusion level ≥ 0.1;  $P < 0.05$ ).**

**Sheet 1: Skipped exons (147 events)**

**Sheet 2: Retained introns (52 events)**

**Sheet 3: Alternative 3' splice site (26 events)**

**Sheet 4: Alternative 5' splice site (17 events)**

**Sheet 5: Mutually exclusive exons (11 events)**
